# Supplementary material for: Highly enantioselective hydrophosphonylation of imines catalyzed by SPINOL-phosphoric acid
Source: Royal Society of Chemistry journal article supplement (doi:10.1039/c3ra40958a), 2013-01-01
Supplement: c3ra40958a.pdf [file c3ra40958a.pdf]

*Supporting Information For:*

**Highly Enantioselective Hydrophosphonylation of Imines Catalyzed by SPINOL-Phosphoric Acid**

*Yanyan Zhao, Xuejian Li, Fan Mo, Luhang Li, and Xufeng Lin\**

Department of Chemistry, Zhejiang University, Hangzhou 310027, P. R. China

Email: lxfok@zju.edu.cn

**CONTENTS**

|                                                                                    |            |
|------------------------------------------------------------------------------------|------------|
| <b>1. <math>^1\text{H}</math> and <math>^{13}\text{C}</math> NMR spectra .....</b> | <b>S2</b>  |
| <b>2. HPLC spectra .....</b>                                                       | <b>S17</b> |

## 1. $^1\text{H}$ and $^{13}\text{C}$ NMR spectra

### Diethyl (S)-(((4-methoxyphenyl)amino)(2-nitrophenyl)methyl)phosphonate (4a)

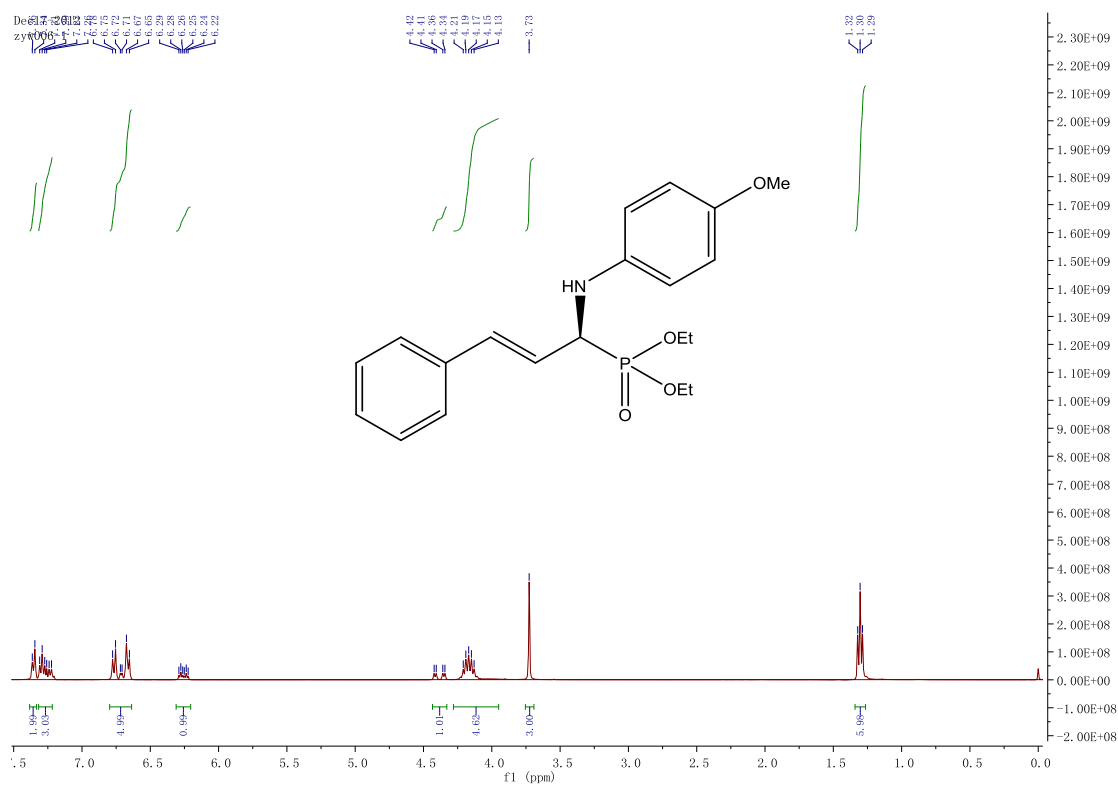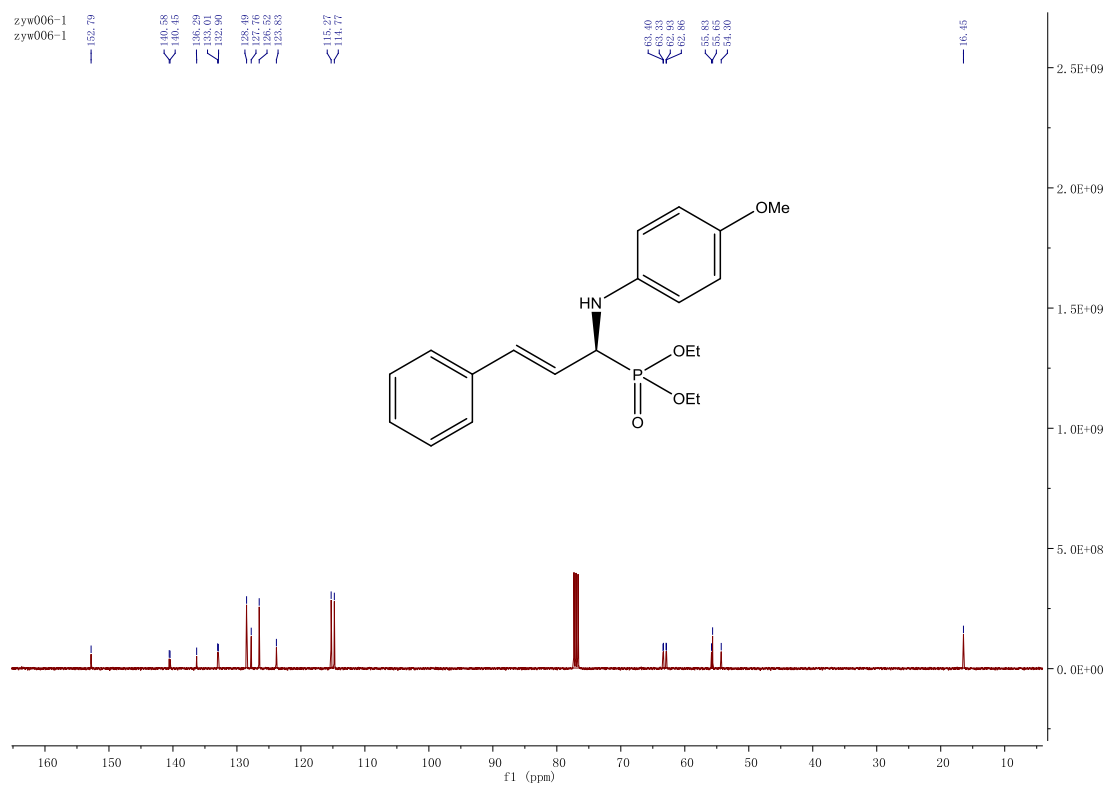

**Diisopropyl (S,E)-1-((4-methoxyphenyl)amino)-3-phenylallyl)phosphonate (4ab)**

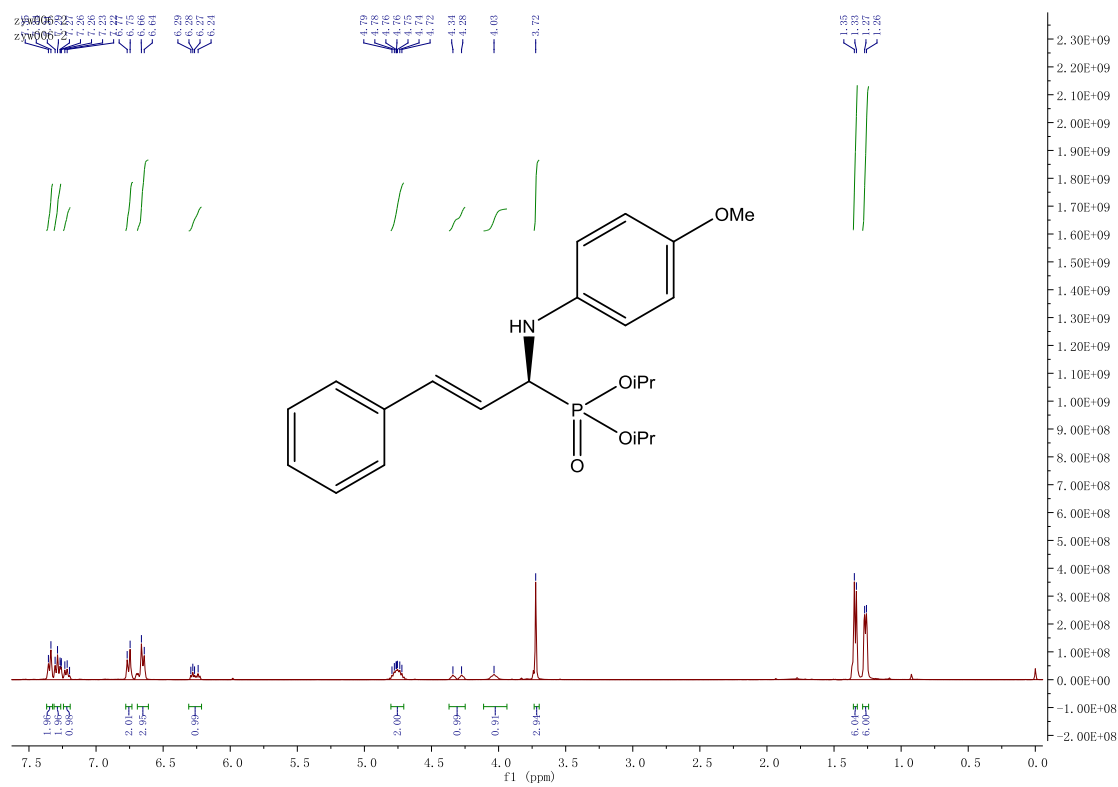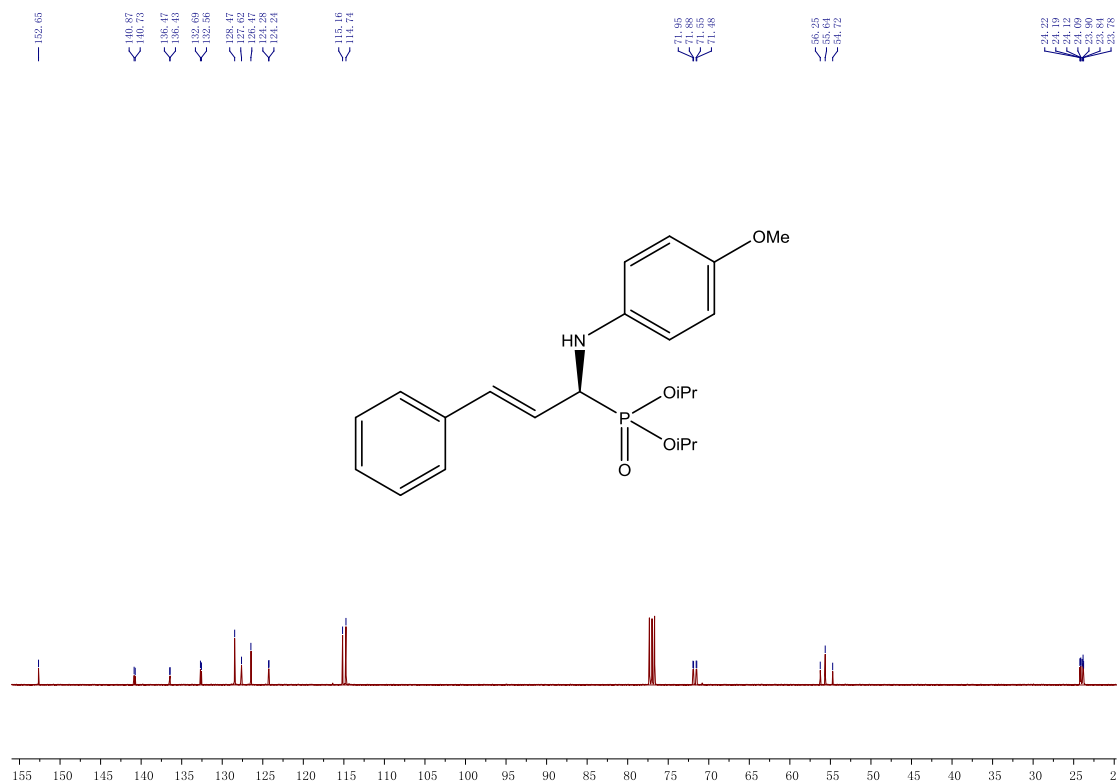



### Diethyl (S,E)-1-((4-methoxyphenyl)amino)-3-(2-nitrophenyl)allyl)phosphonate (4b)

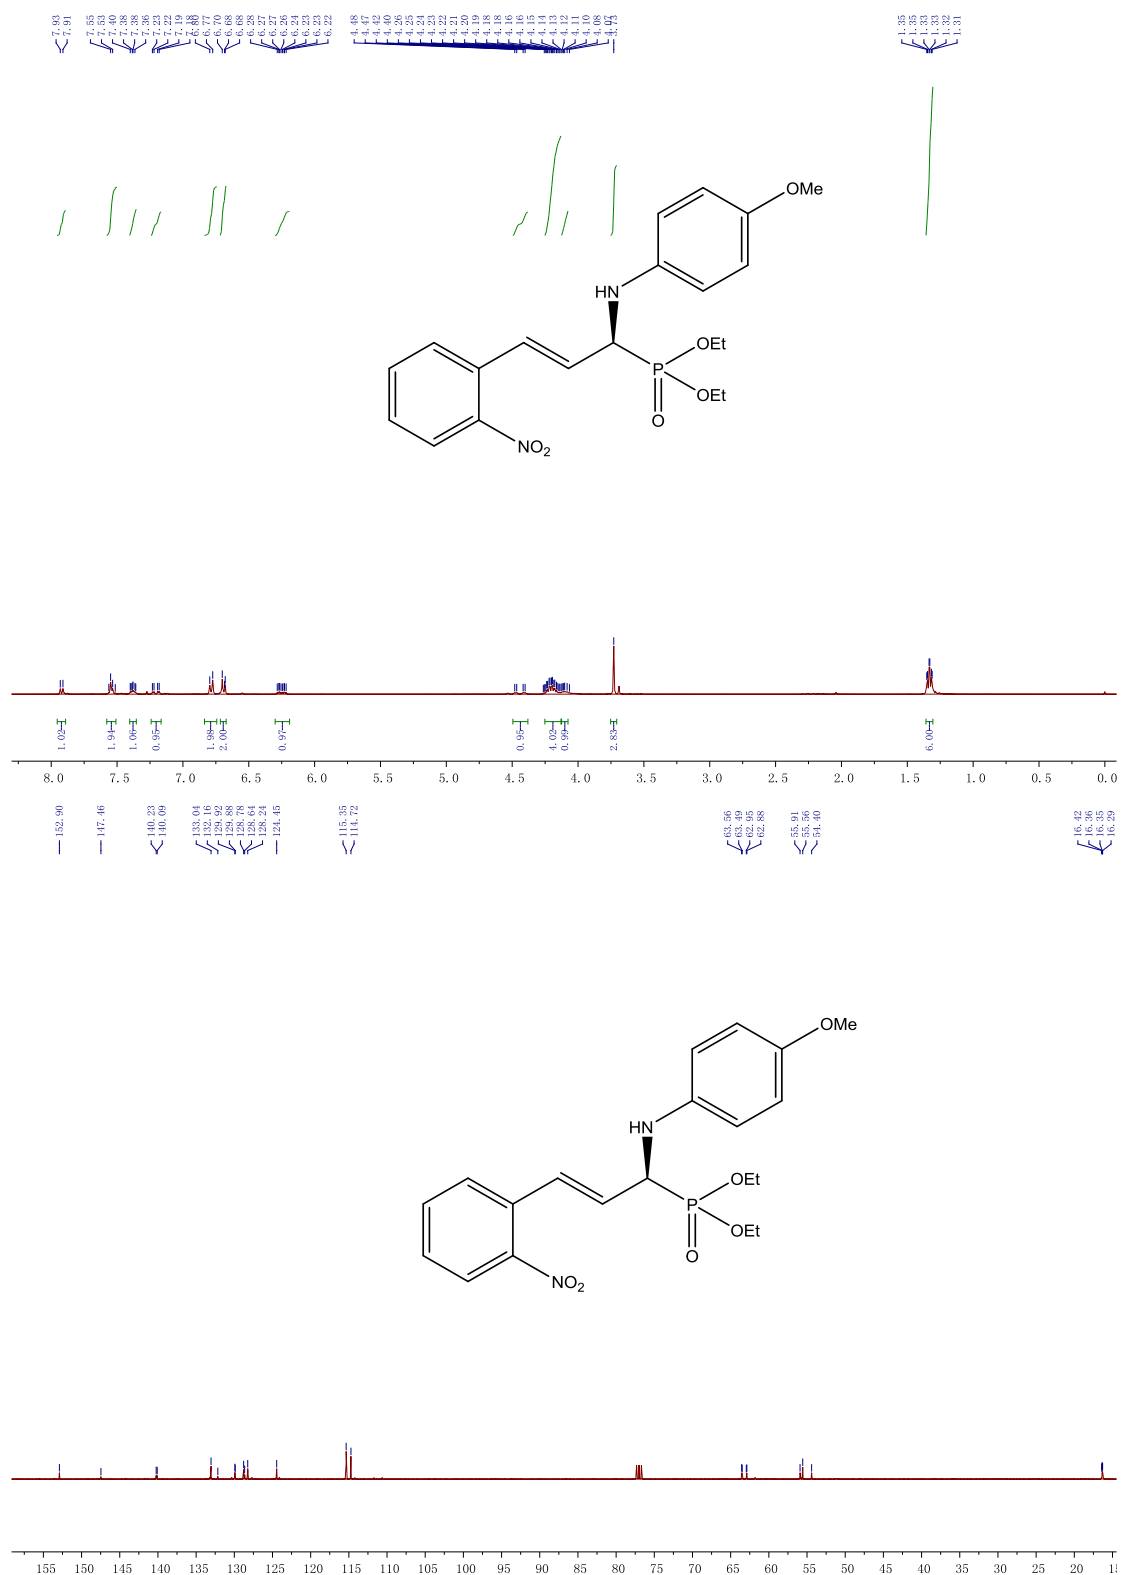

### Diethyl (S,E)-1-((4-methoxyphenyl)amino)-3-(4-nitrophenyl)allyl)phosphonate (4c)

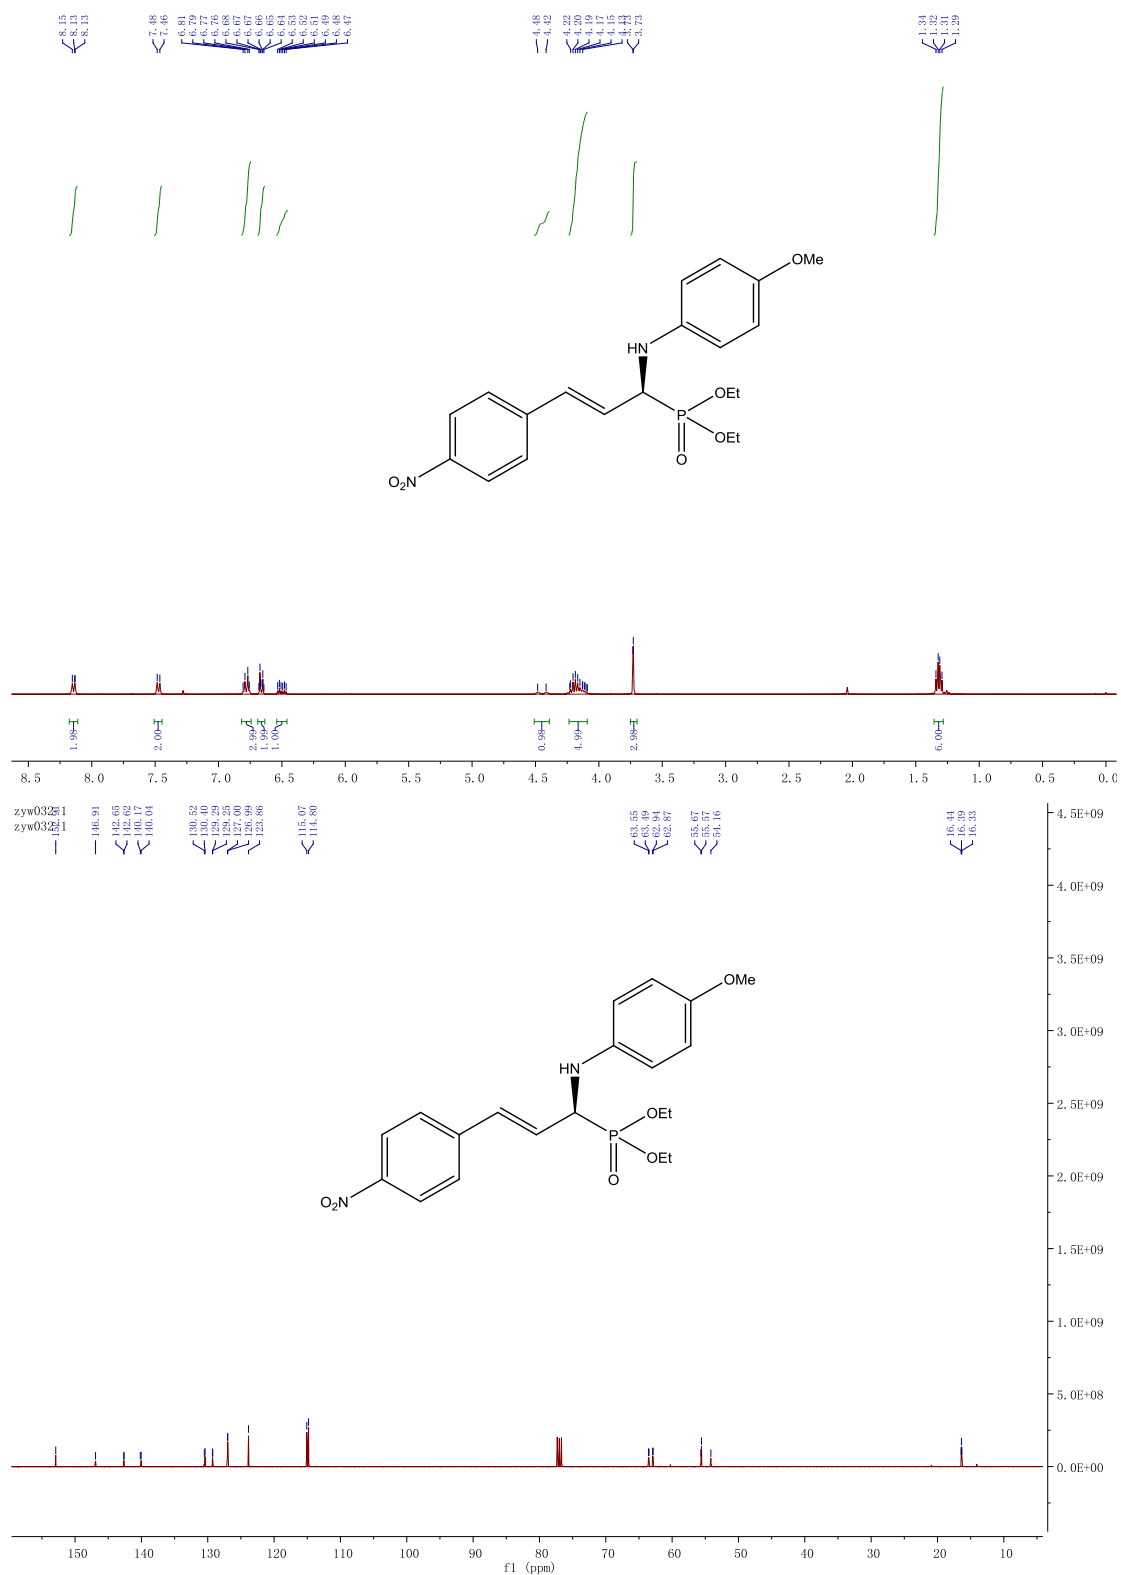

### Diethyl (S,E)-(3-(2-chlorophenyl)-1-((4-methoxyphenyl)amino)allyl)phosphonate (4d)

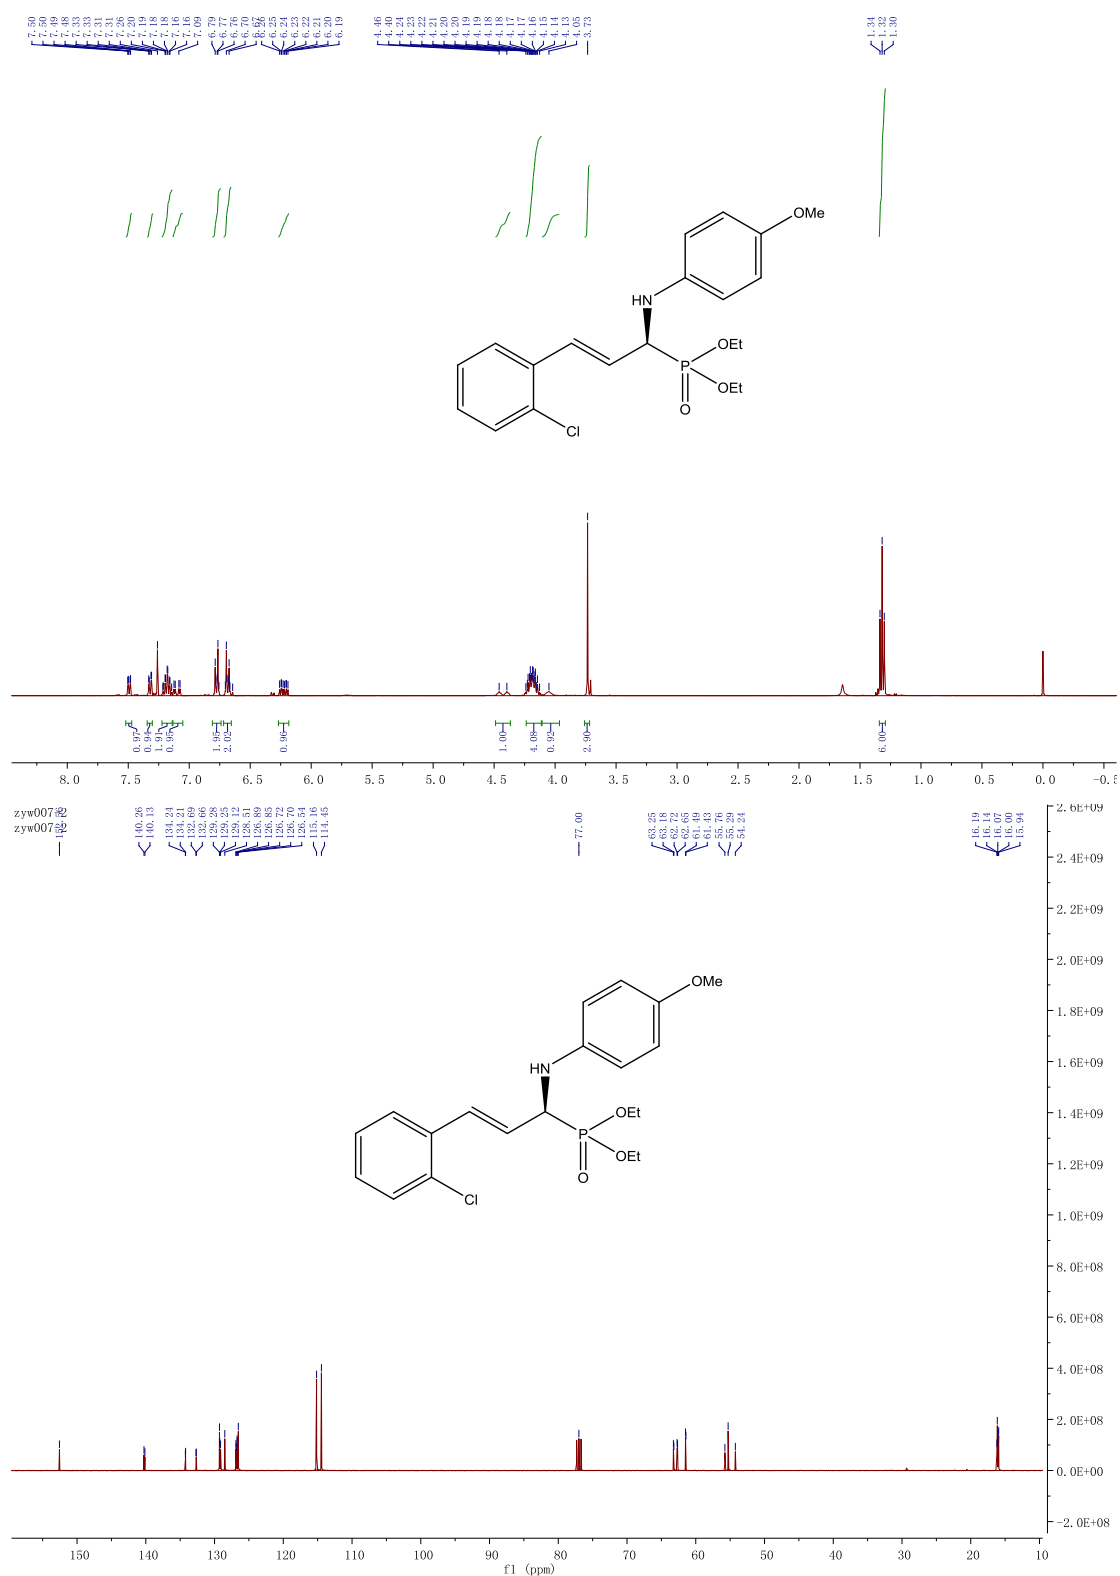

### Diethyl (S,E)-(3-(3-chlorophenyl)-1-((4-methoxyphenyl)amino)allyl)phosphonate (4e)

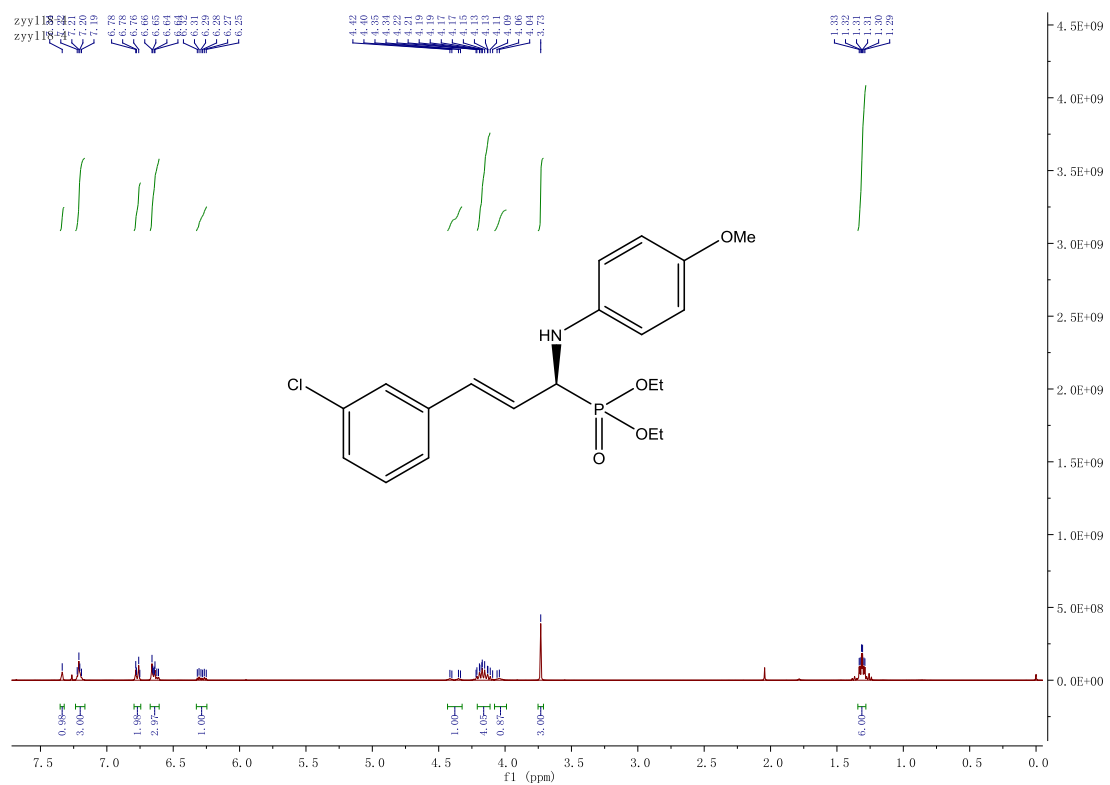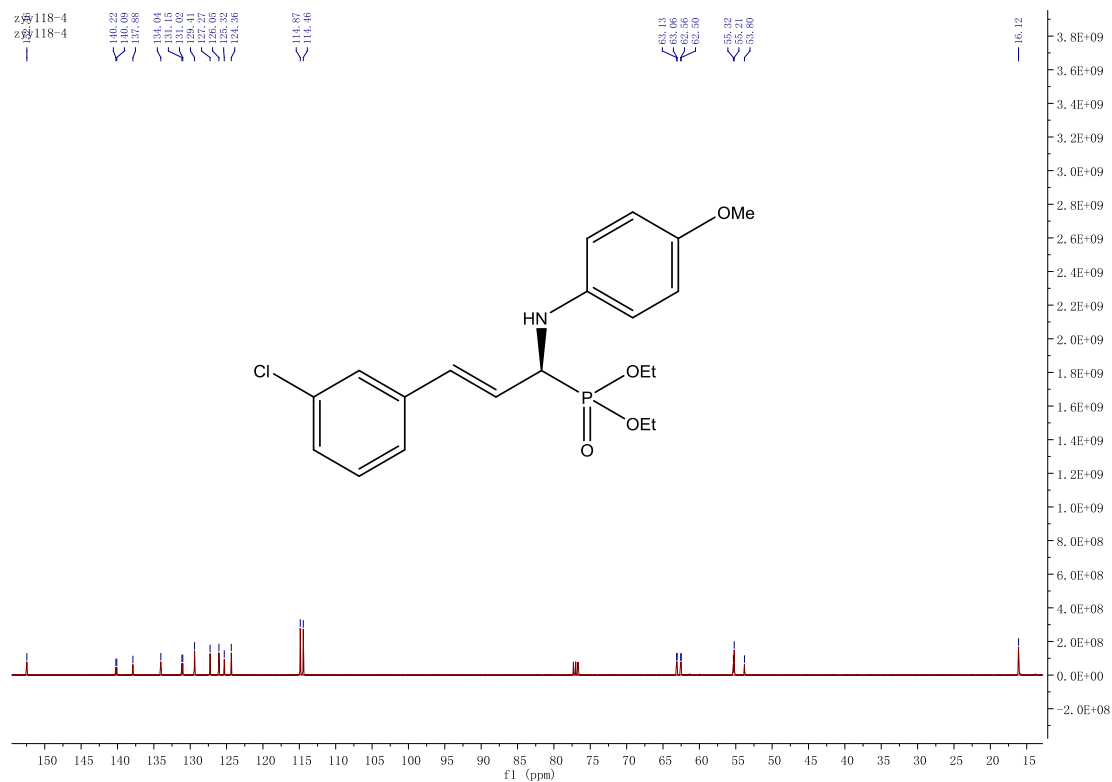



### Diethyl (S,E)-3-(2-methoxyphenyl)-1-((4-methoxyphenyl)amino)allylphosphonate (4f)

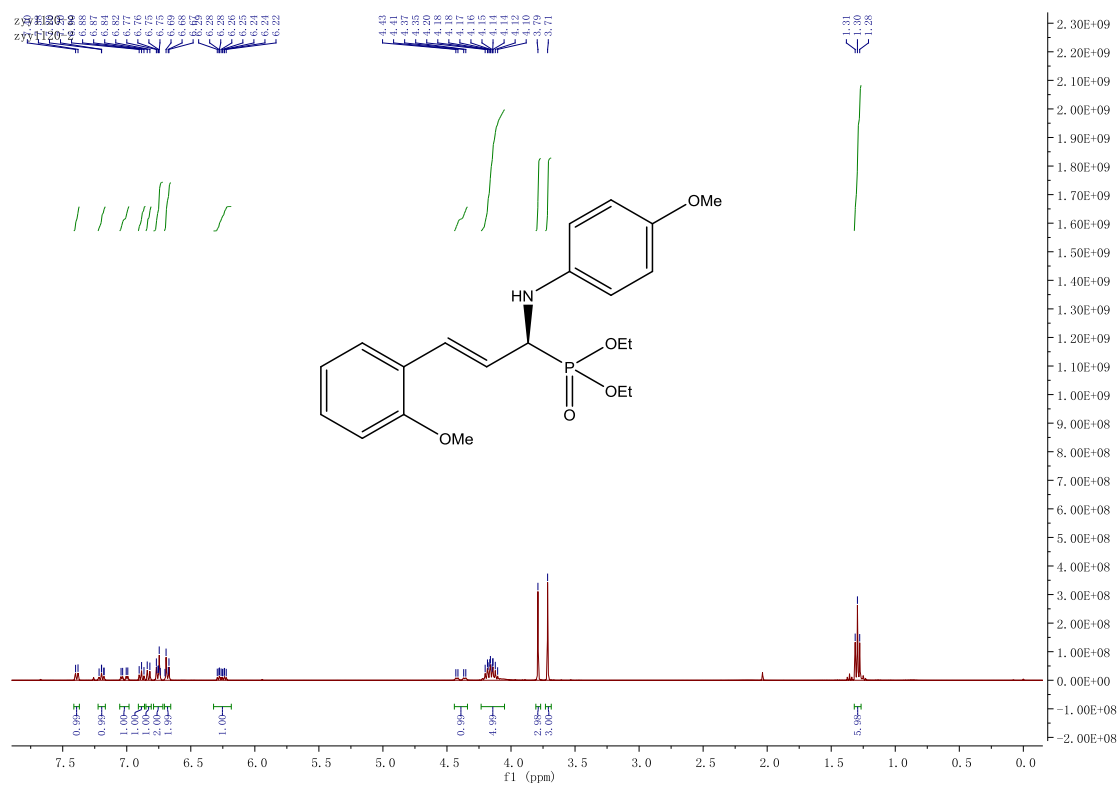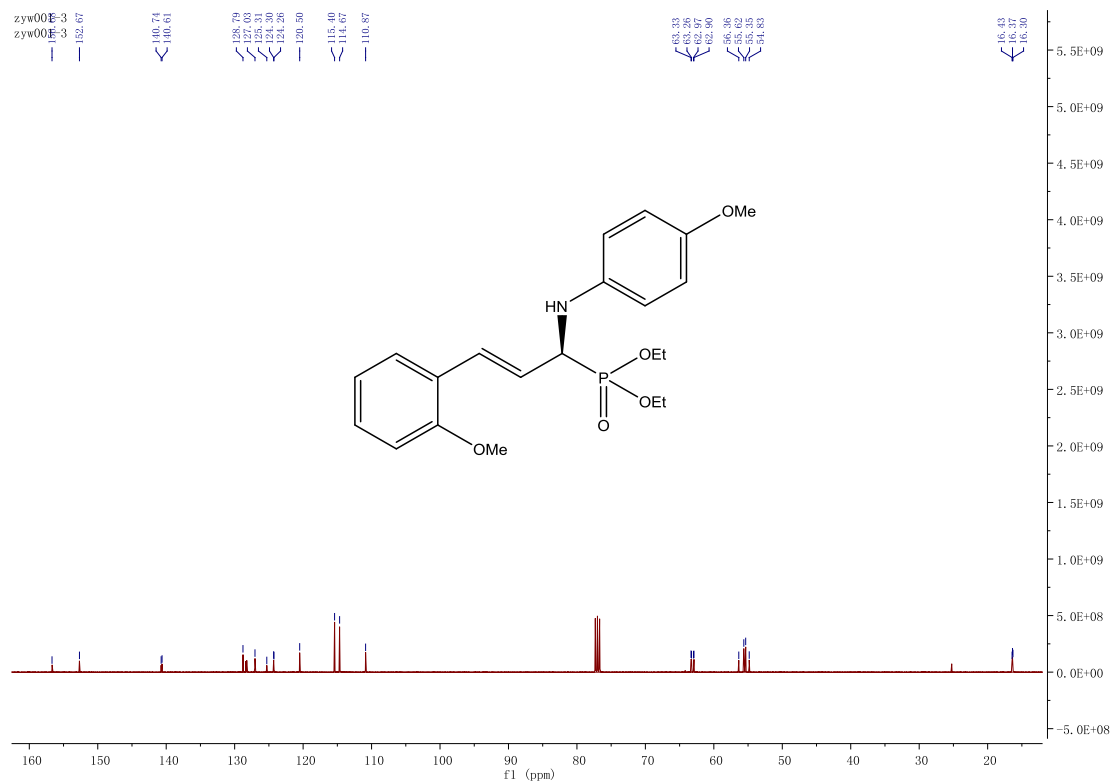

### Diethyl (S,E)-3-(4-methoxyphenyl)-1-((4-methoxyphenyl)amino)allylphosphonate (4g)

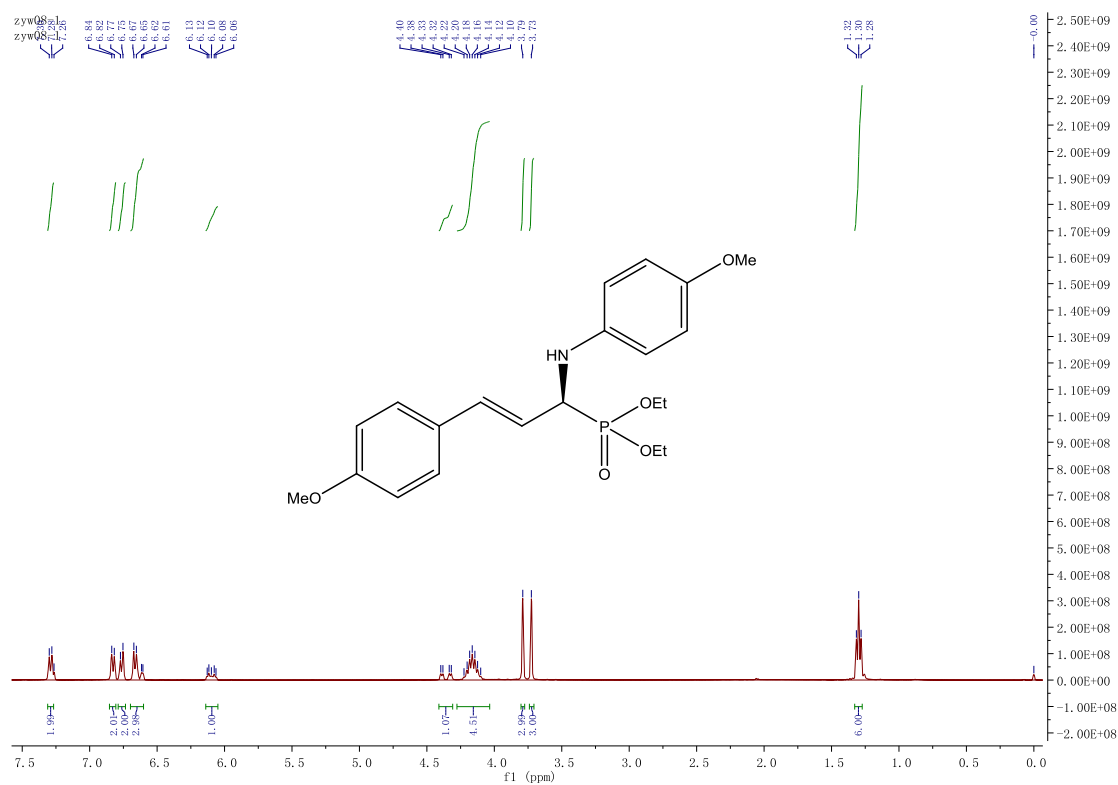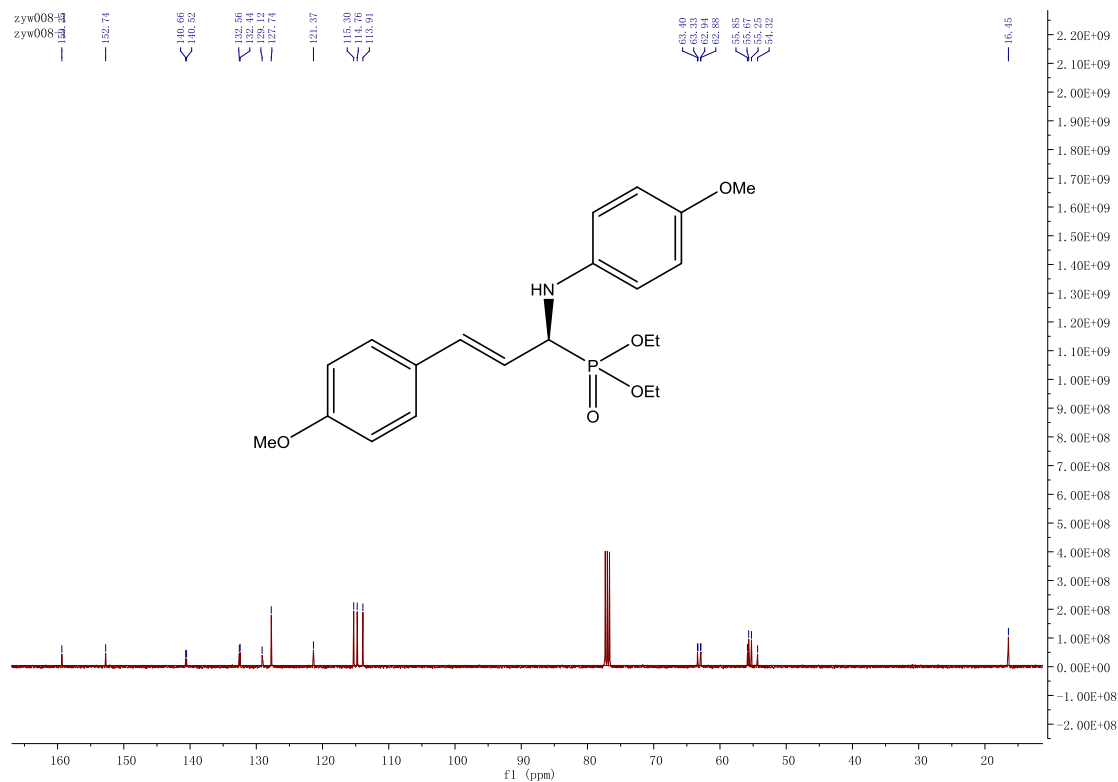

### Diethyl (S,E)-(3-phenyl-1-(phenylamino)allyl)phosphonate (4h)

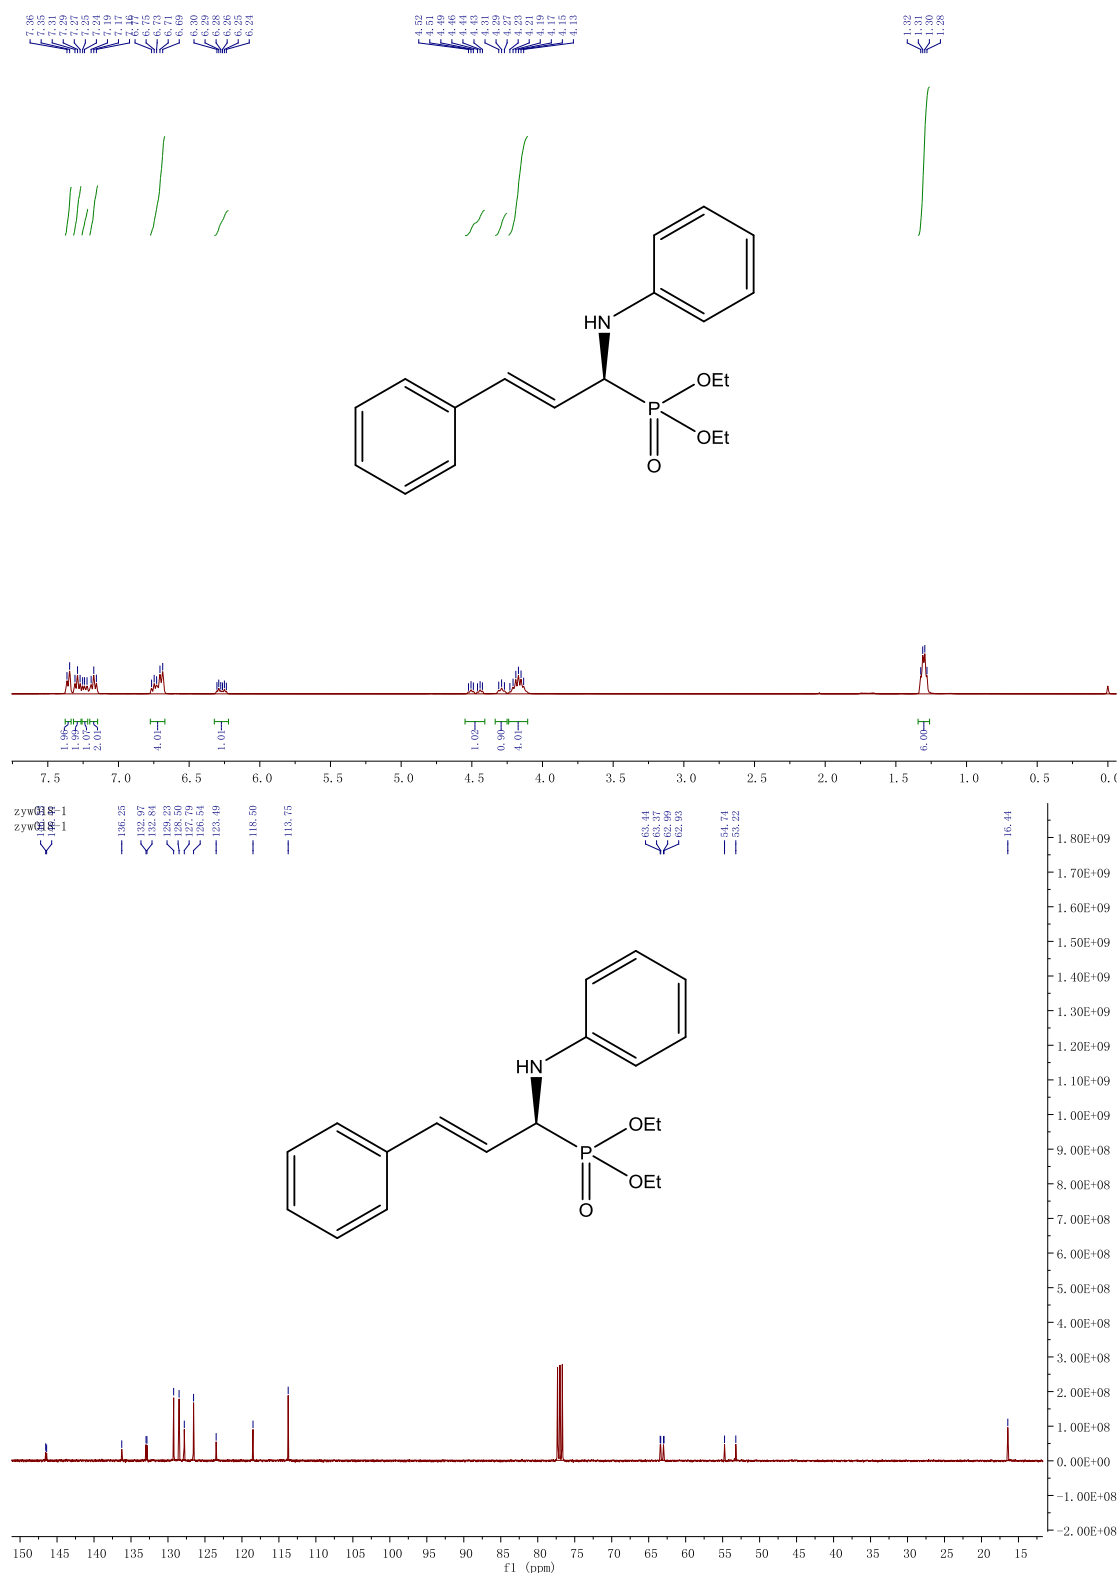

### Diethyl (S,E)-1-((3-chlorophenyl)amino)-3-phenylallyl)phosphonate (4i)

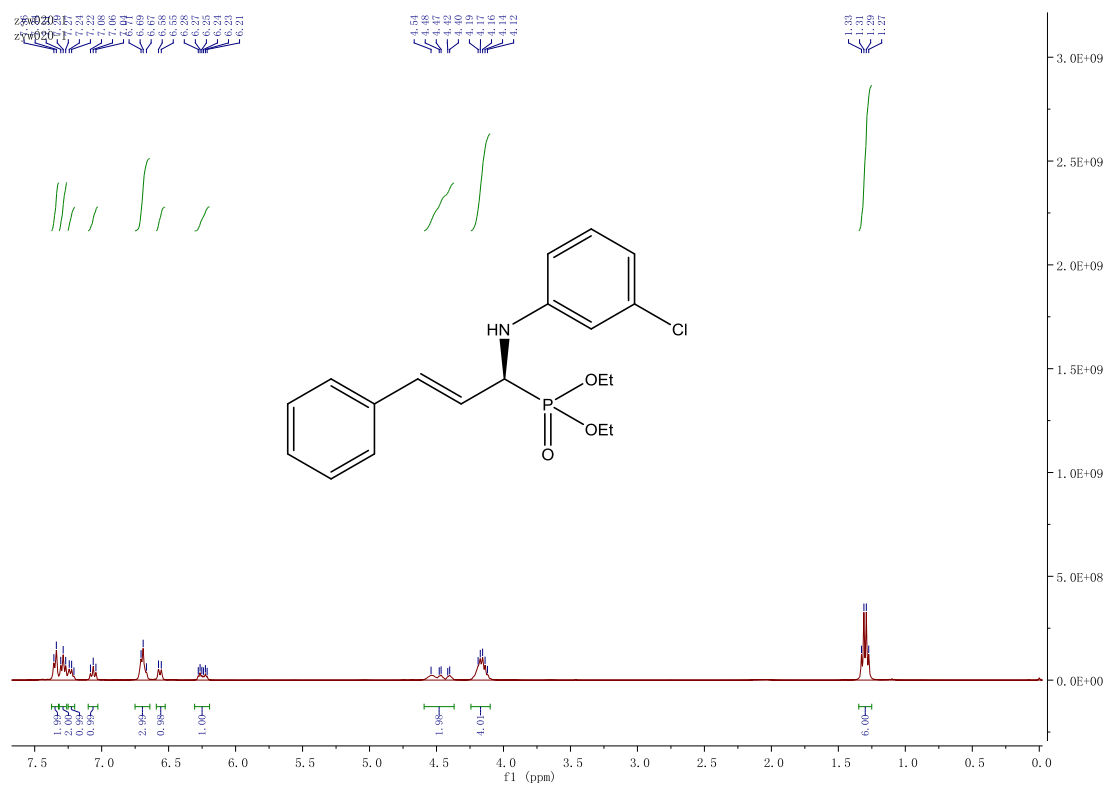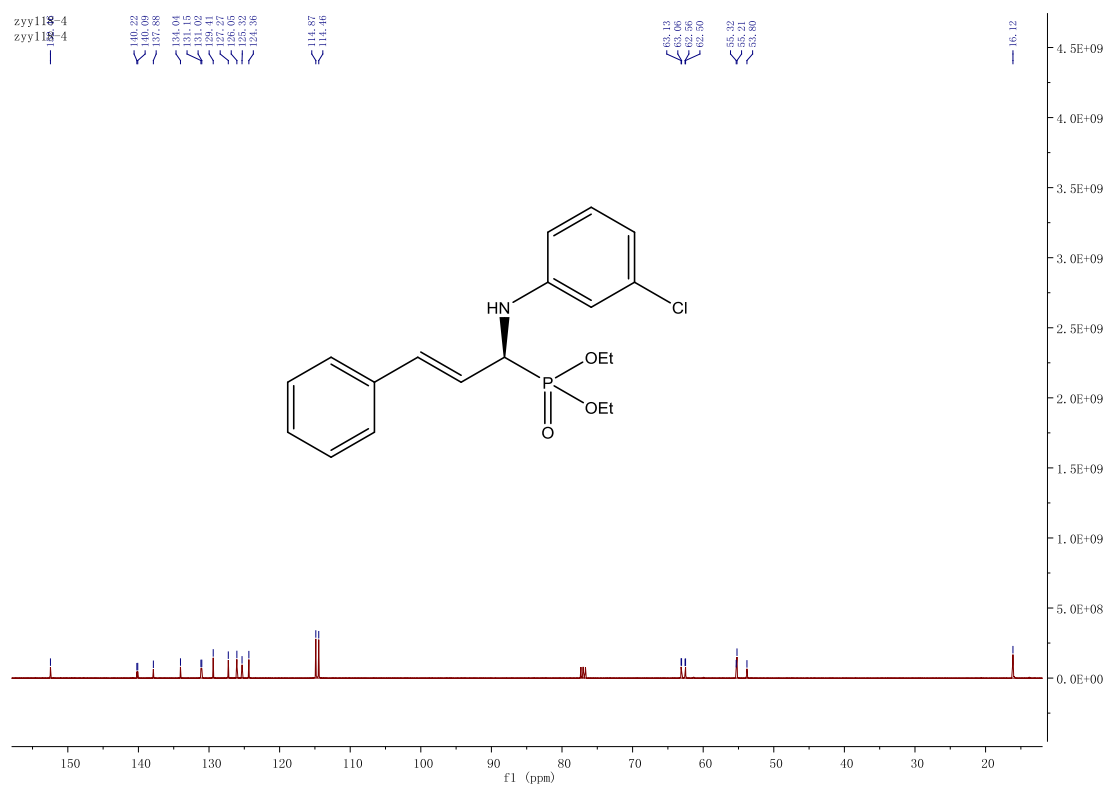

### Diethyl (R,E)-1-((4-bromophenyl)amino)-3-phenylallyl)phosphonate (4j)

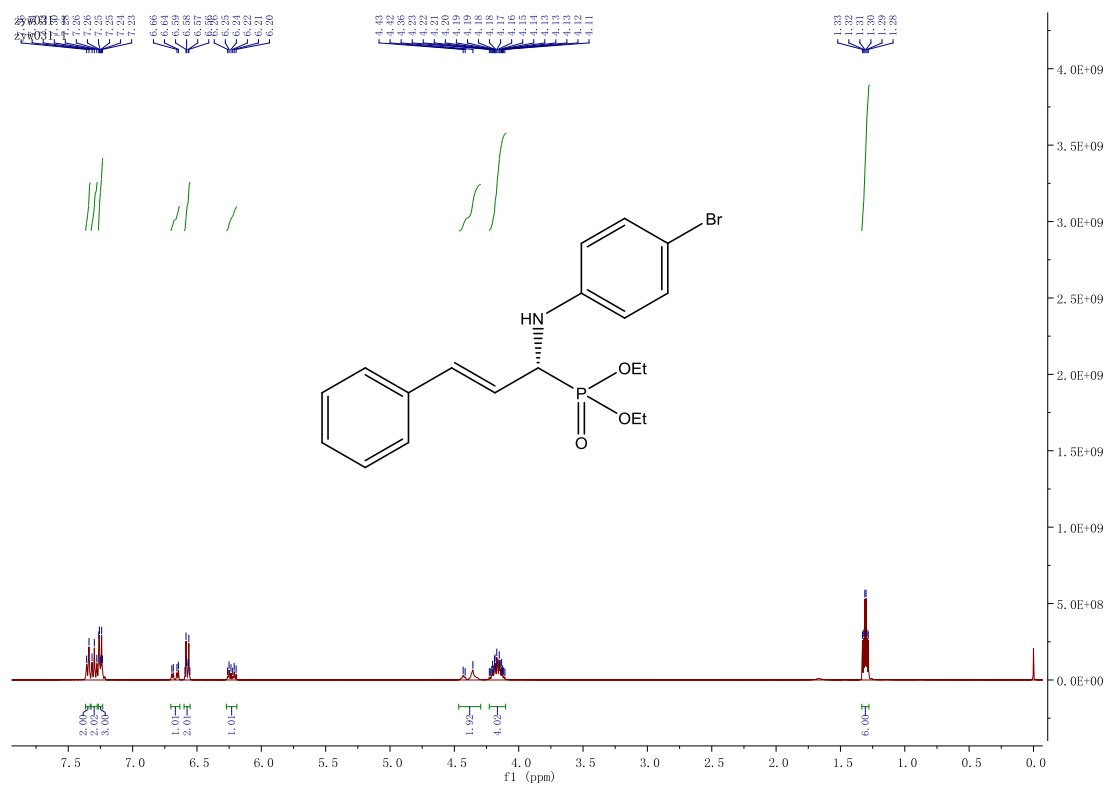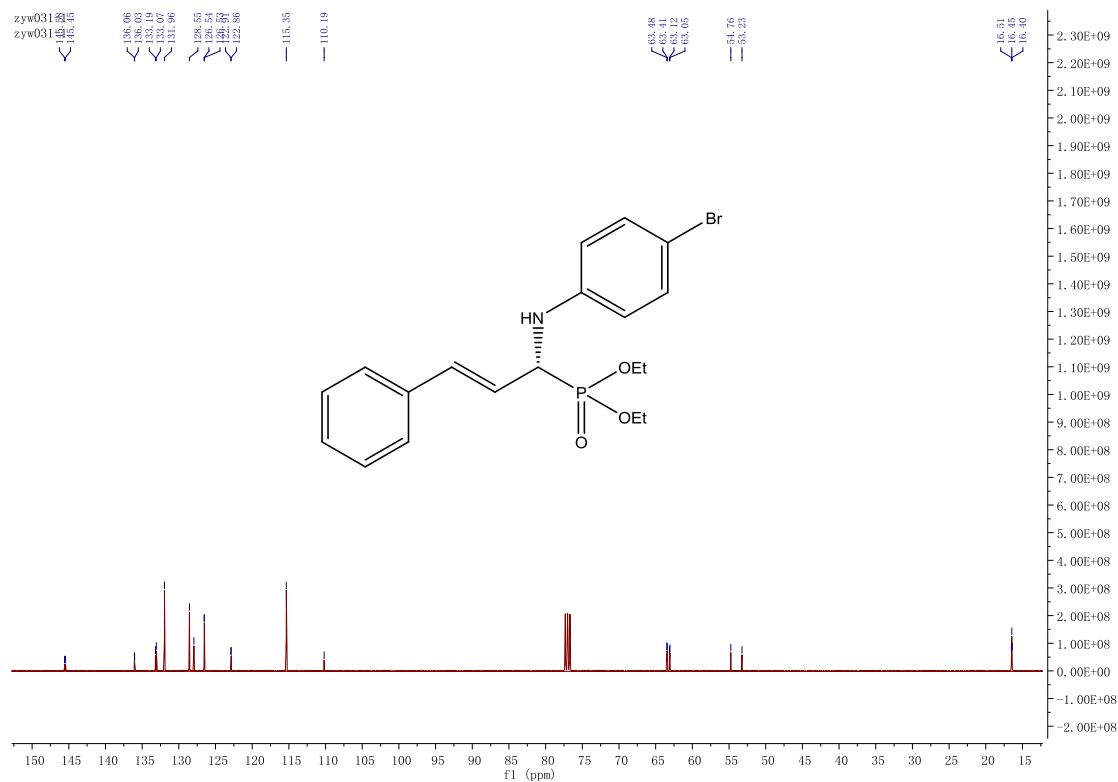

Diethyl (*R,E*)-1-(3-chlorophenyl)amino-3-(2-nitrophenyl)allylphosphonate (**4k**)

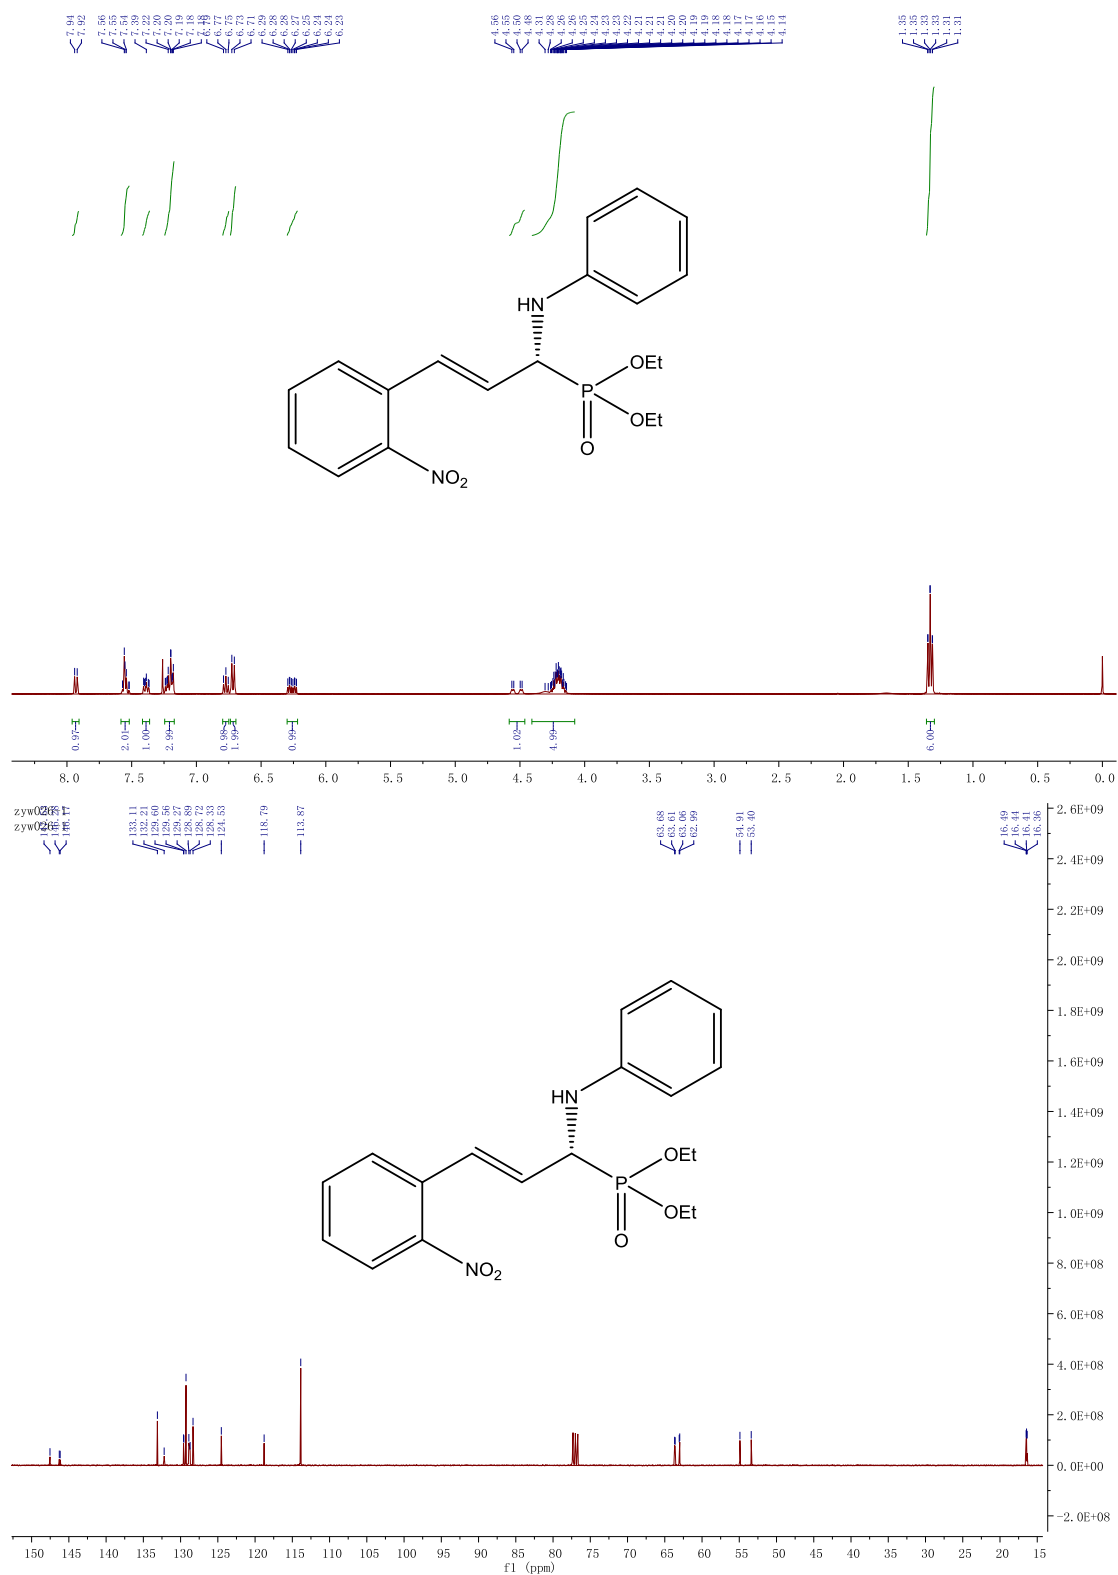

### Diethyl (R,E)-1-((3-chlorophenyl)amino)-3-(2-nitrophenyl)allylphosphonate (4l)

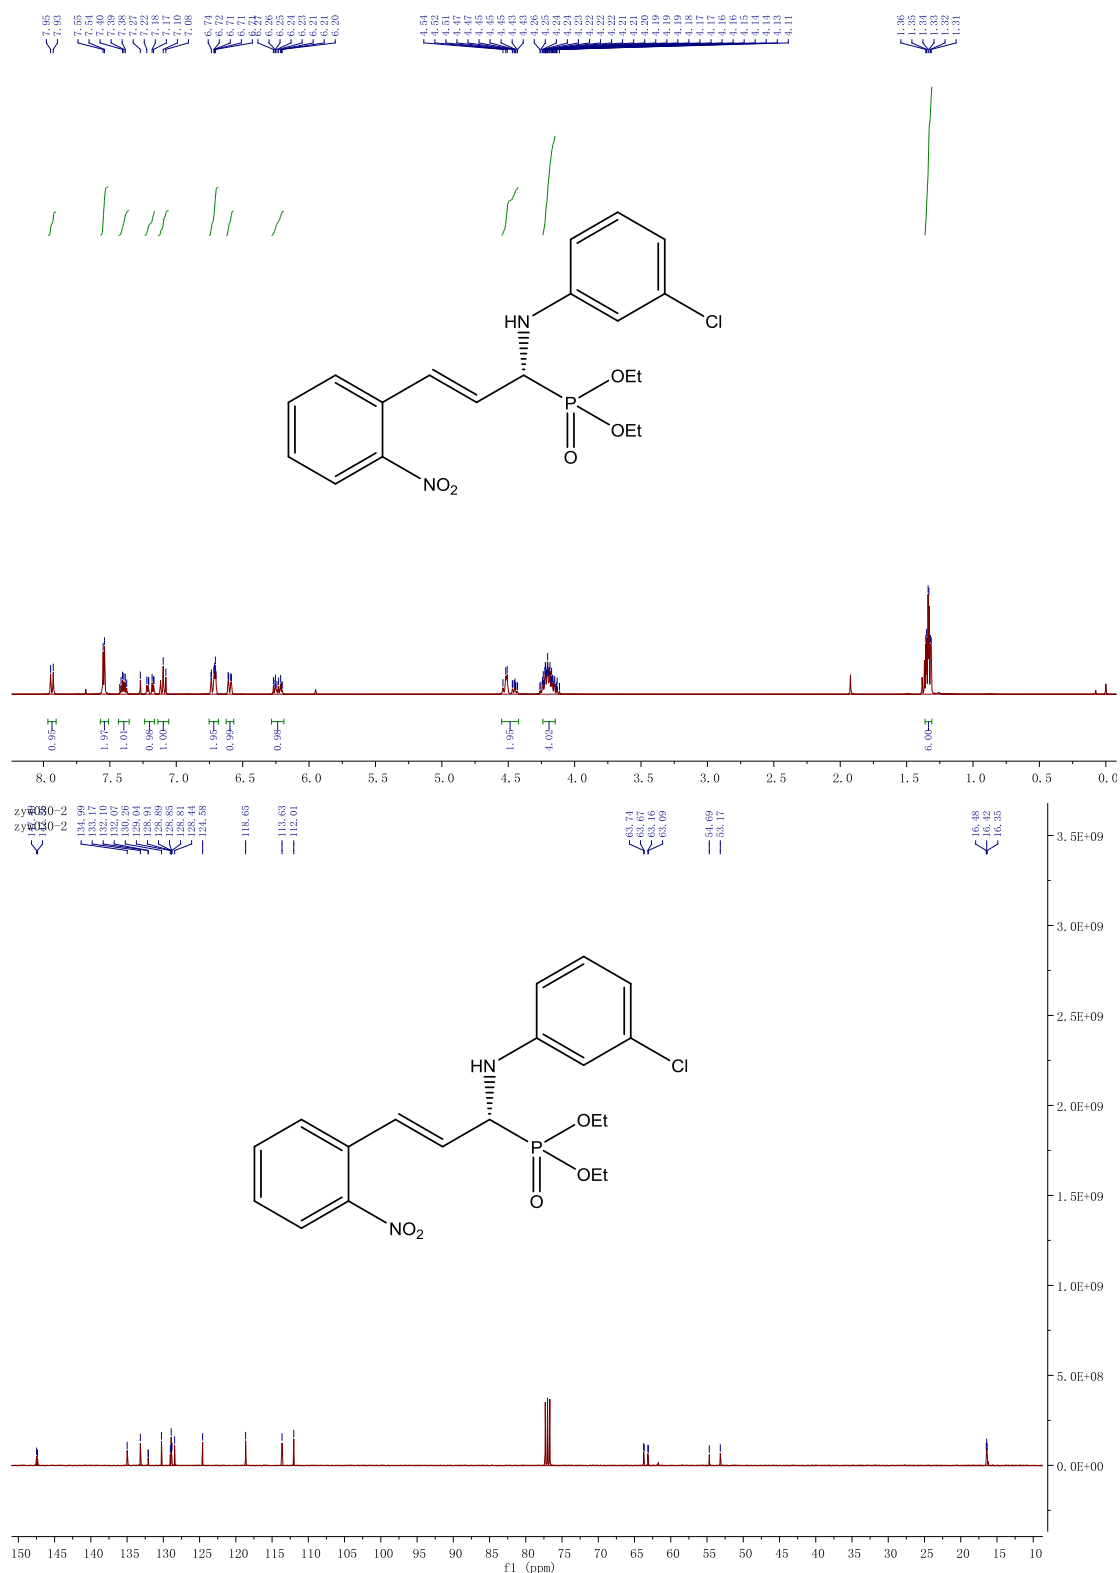

**Diethyl (R)-(((4-methoxyphenyl)amino)(2-nitrophenyl)methyl)phosphonate (4m)**

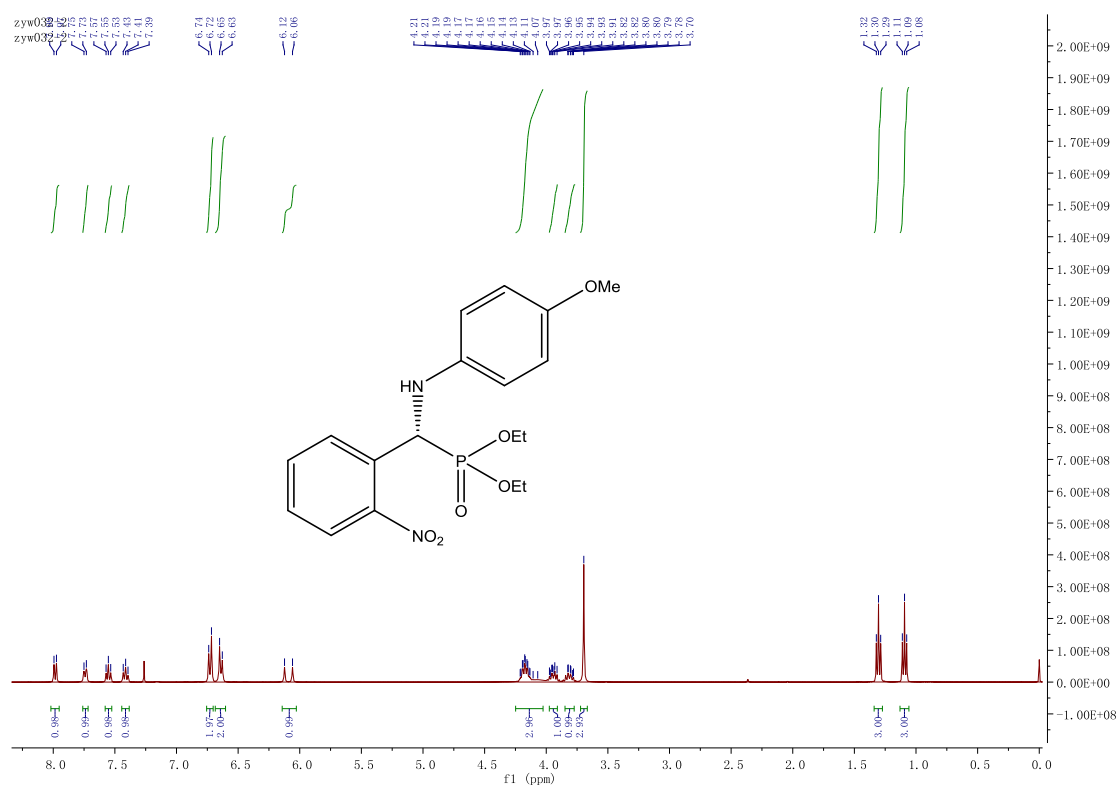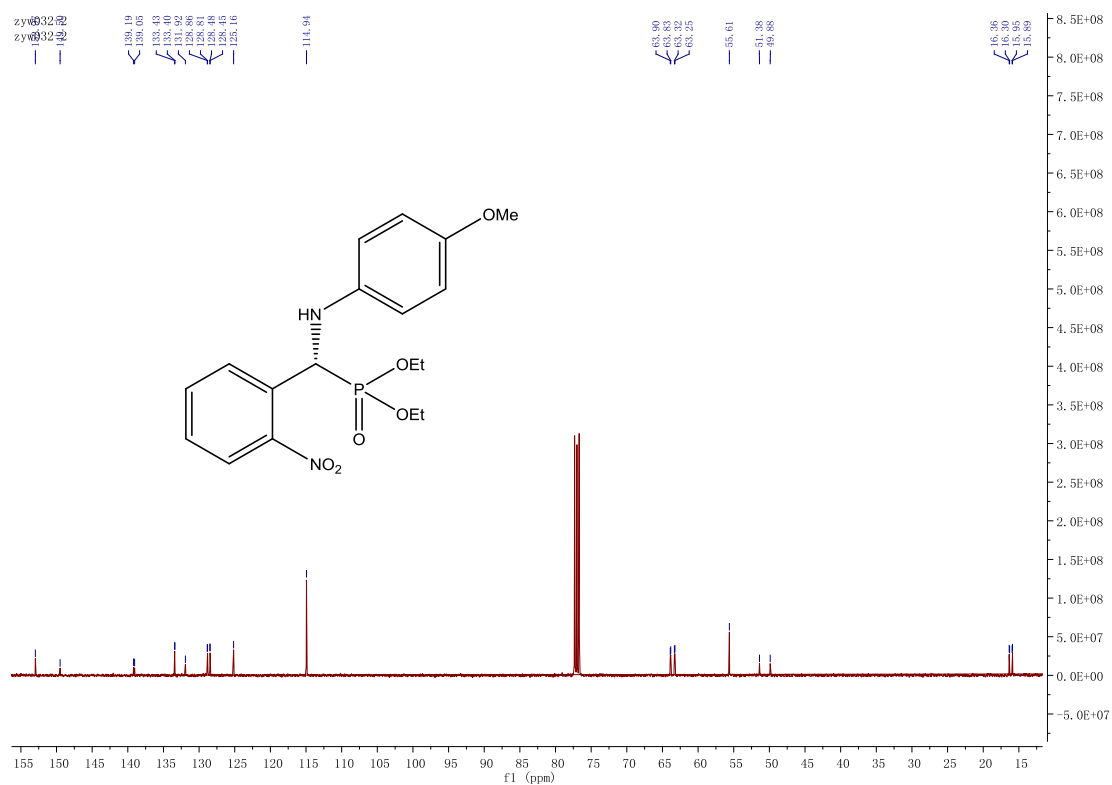



### Diethyl (S,E)-(1-amino-3-(2-chlorophenyl)allyl)phosphonate (5)

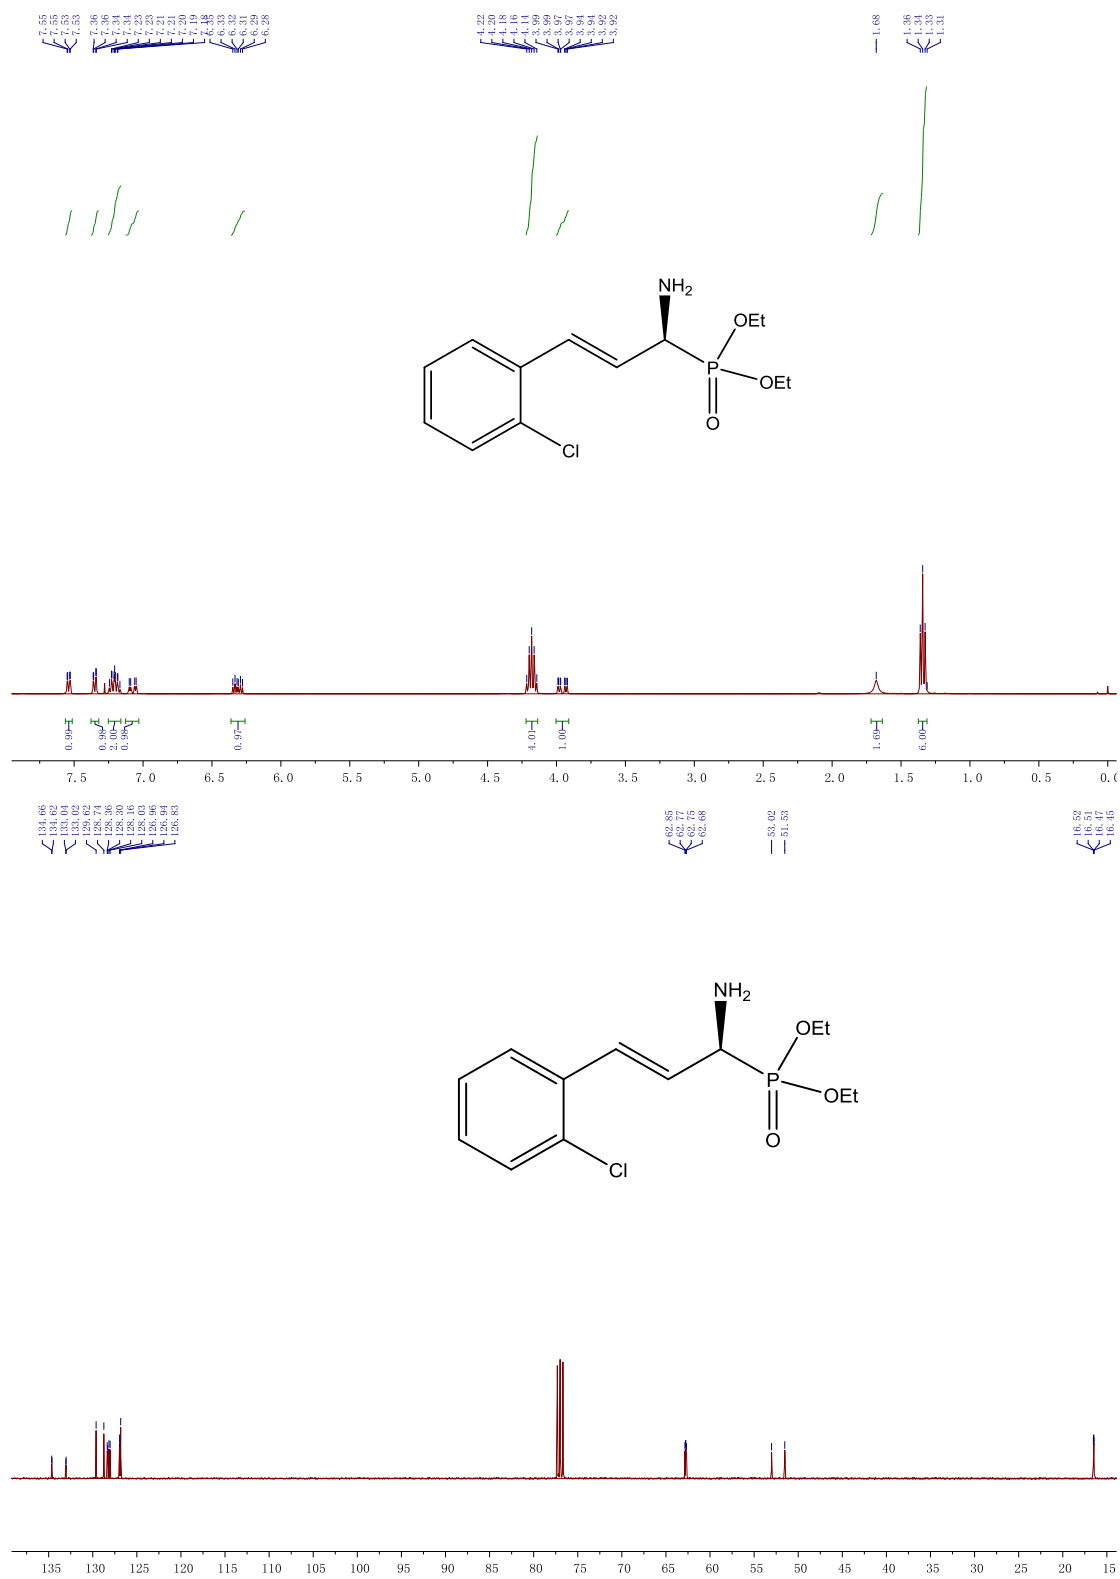

## 2. HPLC spectra

### Diethyl (S,E)-1-((4-methoxyphenyl)amino)-3-phenylallyl)phosphonate (4a)

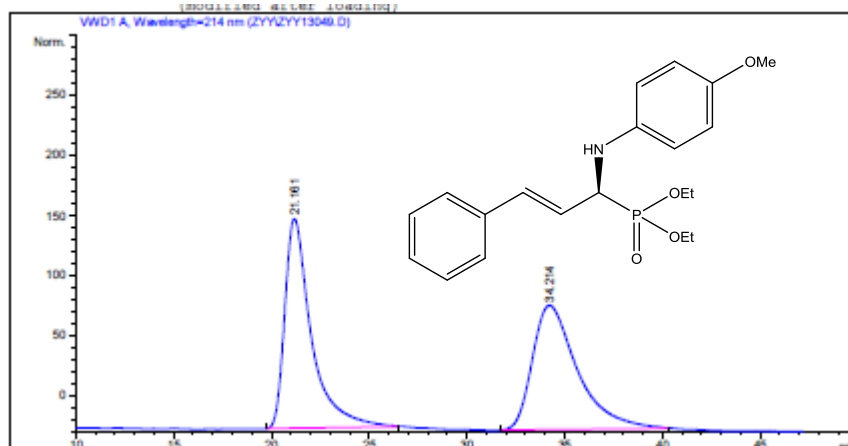

#### Area Percent Report

Sorted By : Signal  
Multiplier : 1.0000  
Dilution : 1.0000  
Use Multiplier & Dilution Factor with ISTDs

Signal 1: VWD1 A, Wavelength=214 nm

| Peak # | RetTime [min] | Type | Width [min] | Area mAU  | Area %  | Height [mAU] | Area %  |
|--------|---------------|------|-------------|-----------|---------|--------------|---------|
| 1      | 21.161        | BB   | 1.4050      | 1.66208e4 | 49.9756 | 174.55481    | 49.9756 |
| 2      | 34.214        | BB   | 2.3610      | 1.66370e4 | 50.0244 | 103.53429    | 50.0244 |

Totals : 3.32578e4 278.08910

Results obtained with enhanced integrator!

\*\*\* End of Report \*\*\*

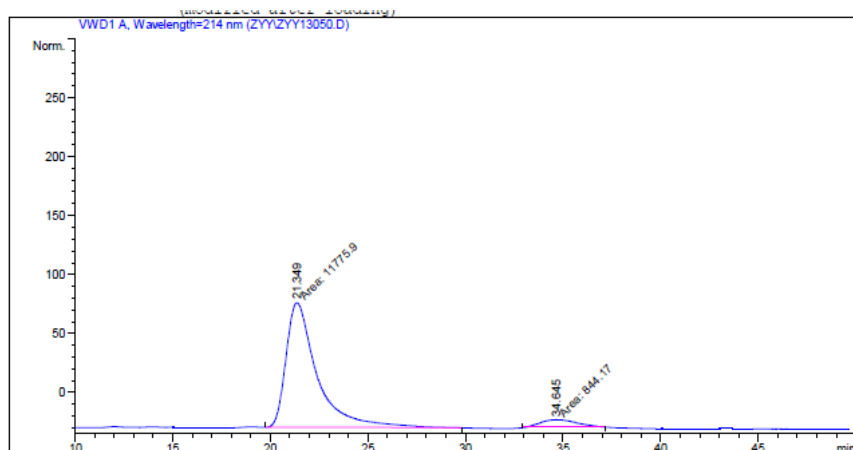

#### Area Percent Report

Sorted By : Signal  
Multiplier : 1.0000  
Dilution : 1.0000  
Use Multiplier & Dilution Factor with ISTDs

Signal 1: VWD1 A, Wavelength=214 nm

| Peak # | RetTime [min] | Type | Width [min] | Area mAU  | Area %  | Height [mAU] | Area %  |
|--------|---------------|------|-------------|-----------|---------|--------------|---------|
| 1      | 21.349        | MM   | 1.8564      | 1.17759e4 | 93.3109 | 105.72190    | 93.3109 |
| 2      | 34.645        | MM   | 2.1668      | 844.17041 | 6.6891  | 6.49313      | 6.6891  |

**Diisopropyl (S,E)-1-((4-methoxyphenyl)amino)-3-phenylallyl)phosphonate (4ab)**

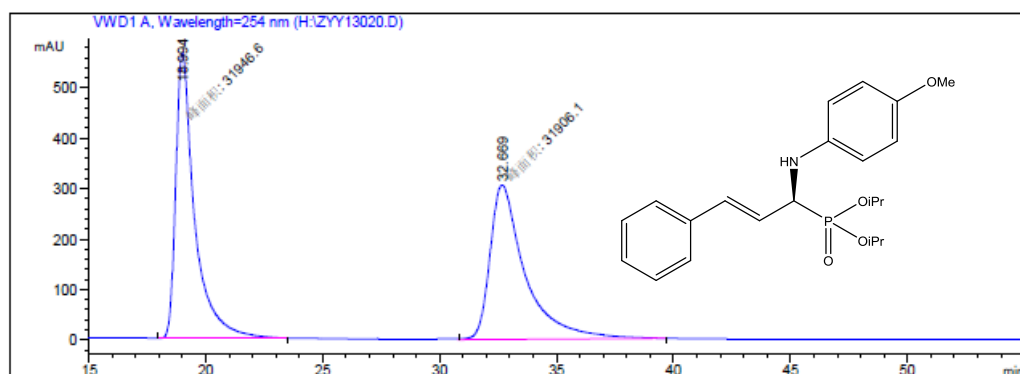

=====  
 面积百分比报告  
 =====

排序 : 信号  
 乘积因子 : 1.0000  
 稀释因子 : 1.0000  
 内标使用乘积因子和稀释因子

信号 1: VWD1 A, Wavelength=254 nm

| 峰 # | 保留时间 [min] | 类型 | 峰宽 [min] | 峰面积 mAU *s | 峰高 [mAU]  | 峰面积 %   |
|-----|------------|----|----------|------------|-----------|---------|
| 1   | 18.994     | MM | 0.9391   | 3.19466e4  | 566.97290 | 50.0317 |
| 2   | 32.669     | MM | 1.7357   | 3.19061e4  | 306.37756 | 49.9683 |

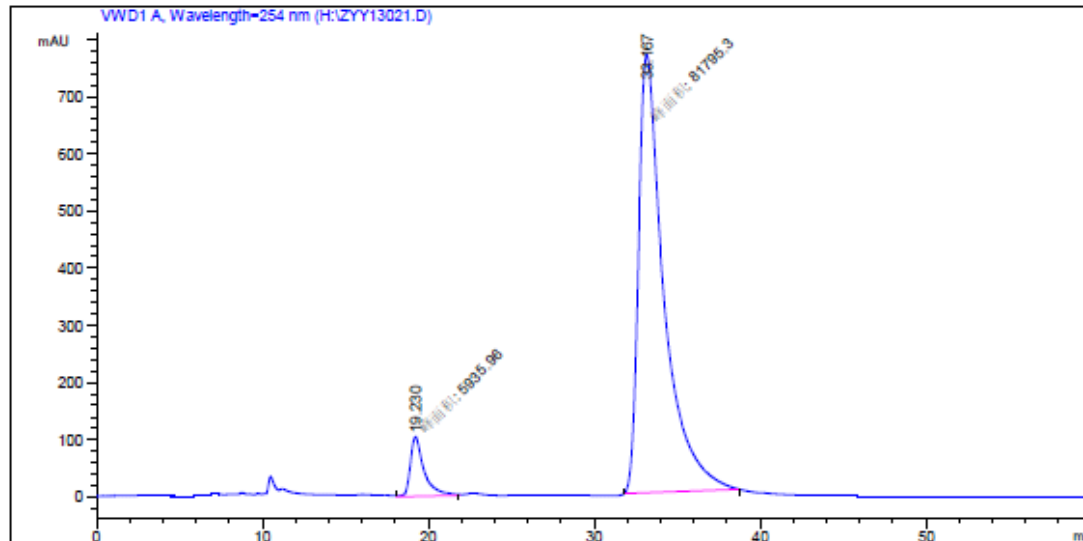

| 峰 # | 保留时间 [min] | 类型 | 峰宽 [min] | 峰面积 mAU *s | 峰高 [mAU]  | 峰面积 %   |
|-----|------------|----|----------|------------|-----------|---------|
| 1   | 19.230     | MM | 0.9512   | 5935.96240 | 104.01104 | 6.7661  |
| 2   | 33.167     | MM | 1.7819   | 8.17953e4  | 765.07147 | 93.2339 |

总量 : 8.77313e4 869.08251

=====  
 \*\*\* 报告结束 \*\*\*

**Dimethyl (S,E)-1-((4-methoxyphenyl)amino)-3-phenylallyl)phosphonate (4ac)**

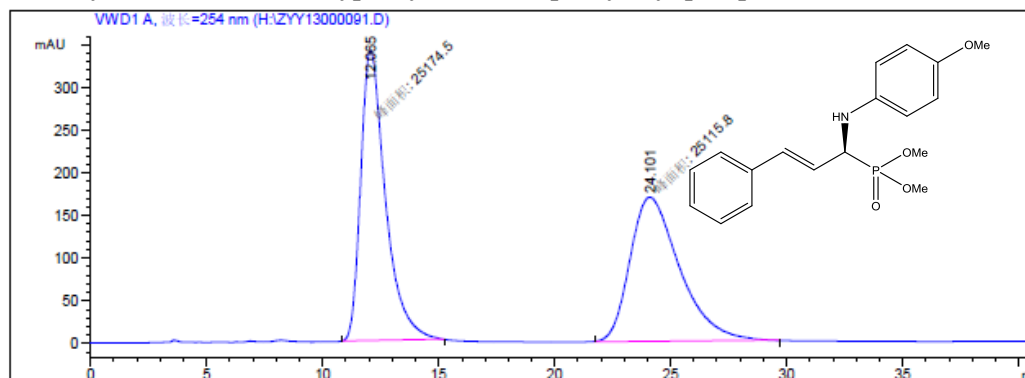

面积百分比报告

排序 : 信号  
 乘积因子 : 1.0000  
 稀释因子 : 1.0000  
 内标使用乘积因子和稀释因子

信号 1: VWD1 A, 波长=254 nm

| 峰 # | 保留时间 [min] | 类型 | 峰宽 [min] | 峰面积 mAU *s | 峰高 [mAU]  | 峰面积 %   |
|-----|------------|----|----------|------------|-----------|---------|
| 1   | 12.065     | MM | 1.2361   | 2.51745e4  | 339.44324 | 50.0584 |
| 2   | 24.101     | MM | 2.4812   | 2.51158e4  | 168.70992 | 49.9416 |

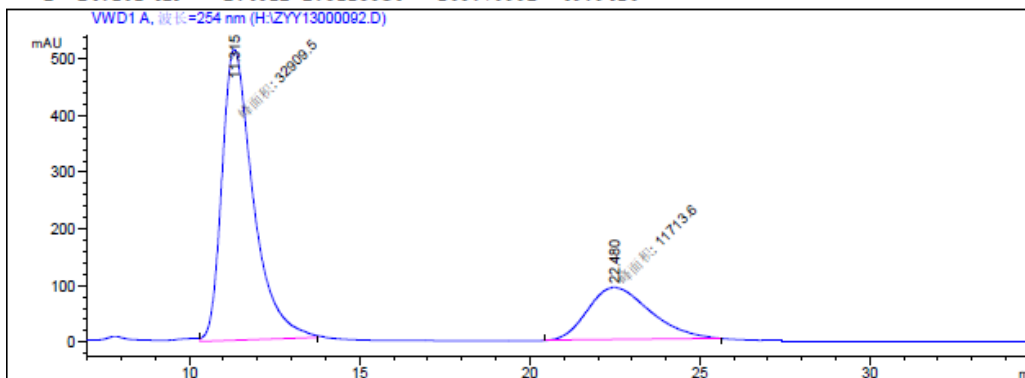

面积百分比报告

排序 : 信号  
 乘积因子 : 1.0000  
 稀释因子 : 1.0000  
 内标使用乘积因子和稀释因子

信号 1: VWD1 A, 波长=254 nm

| 峰 # | 保留时间 [min] | 类型 | 峰宽 [min] | 峰面积 mAU *s | 峰高 [mAU]  | 峰面积 %   |
|-----|------------|----|----------|------------|-----------|---------|
| 1   | 11.315     | MM | 1.0673   | 3.29095e4  | 513.92810 | 73.7499 |
| 2   | 22.480     | MM | 2.1238   | 1.17136e4  | 91.92217  | 26.2501 |

**Diethyl (S,E)-1-((4-methoxyphenyl)amino)-3-(2-nitrophenyl)allyl)phosphonate (4b)**

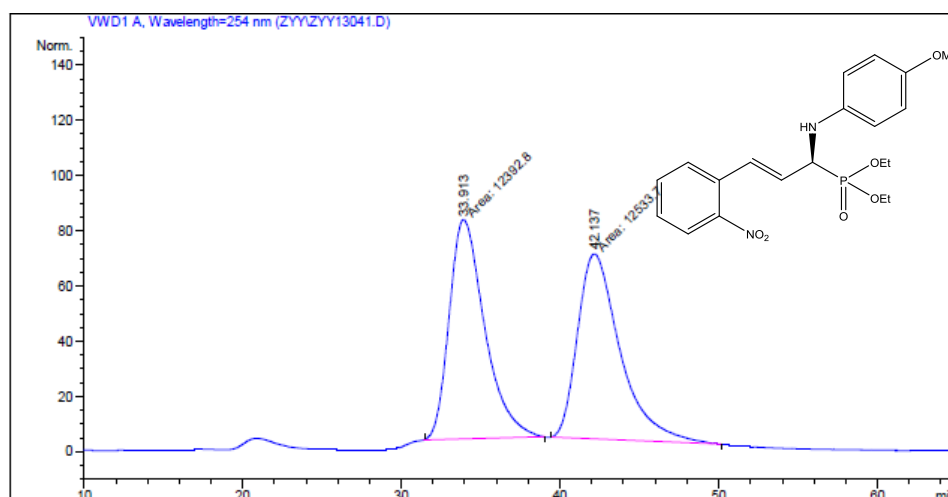

=====  
 Area Percent Report  
 =====

Sorted By : Signal  
 Multiplier : 1.0000  
 Dilution : 1.0000  
 Use Multiplier & Dilution Factor with ISTDs

Signal 1: VWD1 A, Wavelength=254 nm

| Peak # | RetTime [min] | Type | Width [min] | Area mAU *s | Height [mAU] | Area %  |
|--------|---------------|------|-------------|-------------|--------------|---------|
| 1      | 33.913        | MM   | 2.5997      | 1.23928e4   | 79.44897     | 49.7173 |
| 2      | 42.137        | MM   | 3.1149      | 1.25337e4   | 67.06396     | 50.2827 |

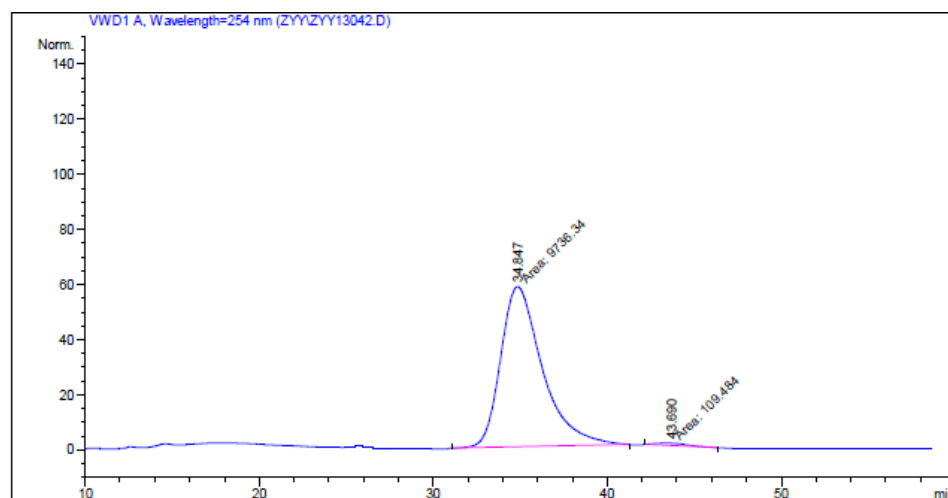

=====  
 Area Percent Report  
 =====

Sorted By : Signal  
 Multiplier : 1.0000  
 Dilution : 1.0000  
 Use Multiplier & Dilution Factor with ISTDs

Signal 1: VWD1 A, Wavelength=254 nm

| Peak # | RetTime [min] | Type | Width [min] | Area mAU *s | Height [mAU] | Area %  |
|--------|---------------|------|-------------|-------------|--------------|---------|
| 1      | 34.847        | MM   | 2.7882      | 9736.33887  | 58.19878     | 98.8880 |
| 2      | 43.690        | MM   | 2.1118      | 109.48378   | 8.64047e-1   | 1.1120  |

**Diethyl (S,E)-1-((4-methoxyphenyl)amino)-3-(4-nitrophenyl)allyl)phosphonate (4c)**

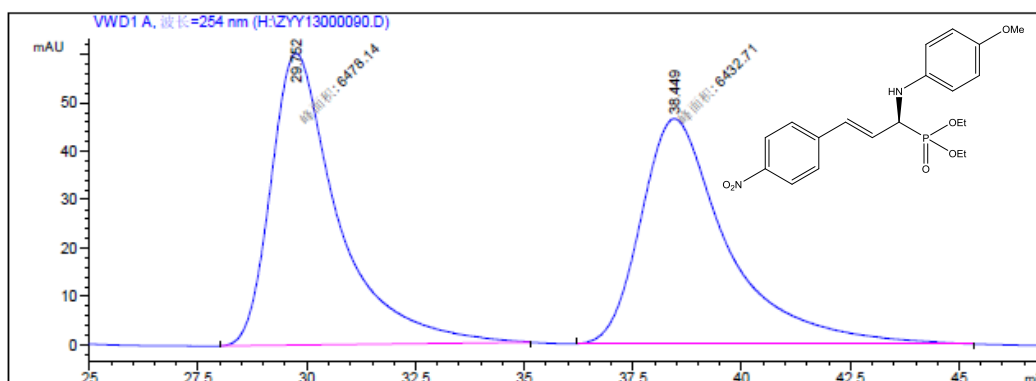

面积百分比报告

排序 : 信号  
 乘积因子 : 1.0000  
 稀释因子 : 1.0000  
 内标使用乘积因子和稀释因子

信号 1: VWD1 A, 波长=254 nm

| 峰 # | 保留时间 [min] | 类型 | 峰宽 [min] | 峰面积 mAU * s | 峰高 [mAU] | 峰面积 %   |
|-----|------------|----|----------|-------------|----------|---------|
| 1   | 29.752     | MM | 1.7867   | 6478.13623  | 60.42803 | 50.1759 |
| 2   | 38.449     | MM | 2.3029   | 6432.71484  | 46.55463 | 49.8241 |

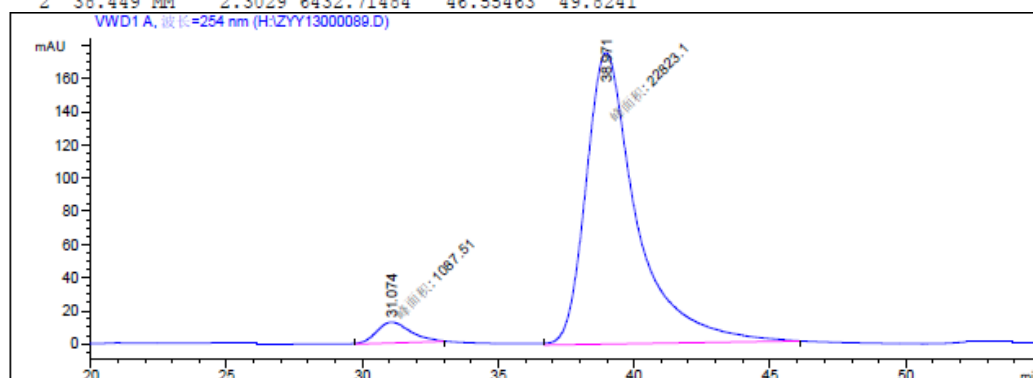

面积百分比报告

排序 : 信号  
 乘积因子 : 1.0000  
 稀释因子 : 1.0000  
 内标使用乘积因子和稀释因子

信号 1: VWD1 A, 波长=254 nm

| 峰 # | 保留时间 [min] | 类型 | 峰宽 [min] | 峰面积 mAU * s | 峰高 [mAU]  | 峰面积 %   |
|-----|------------|----|----------|-------------|-----------|---------|
| 1   | 31.074     | MM | 1.4401   | 1087.50989  | 12.58645  | 4.5482  |
| 2   | 38.971     | MM | 2.1641   | 2.28231e4   | 175.76933 | 95.4518 |

### Diethyl (S,E)-3-(2-chlorophenyl)-1-((4-methoxyphenyl)amino)allyl)phosphonate (4d)

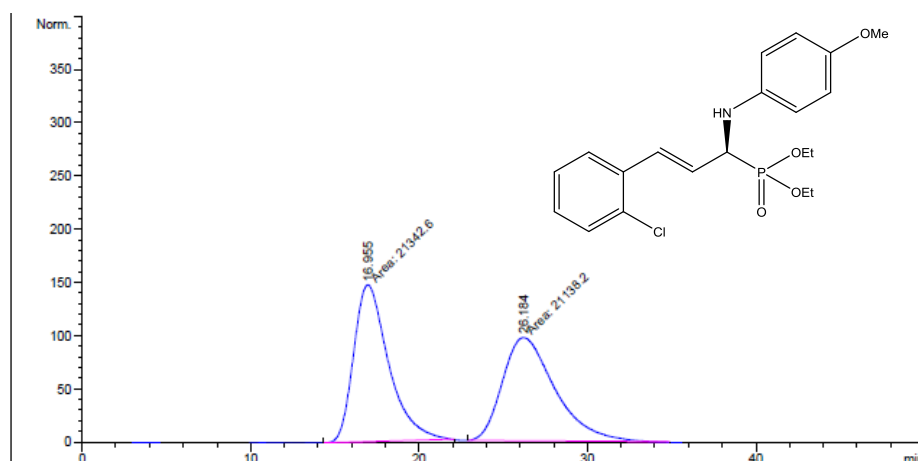

=====  
Area Percent Report  
=====

Sorted By : Signal  
Multiplier : 1.0000  
Dilution : 1.0000  
Use Multiplier & Dilution Factor with ISTDs

Signal 1: VWD1 A, Wavelength=254 nm

| Peak # | RetTime [min] | Type | Width [min] | Area mAU *s | Height [mAU] | Area %  |
|--------|---------------|------|-------------|-------------|--------------|---------|
| 1      | 16.955        | MM   | 2.4106      | 2.13426e4   | 147.55788    | 50.2405 |
| 2      | 26.184        | MM   | 3.6314      | 2.11382e4   | 97.01599     | 49.7595 |

VWD1 A, Wavelength=254 nm (ZYYZY12103.D)

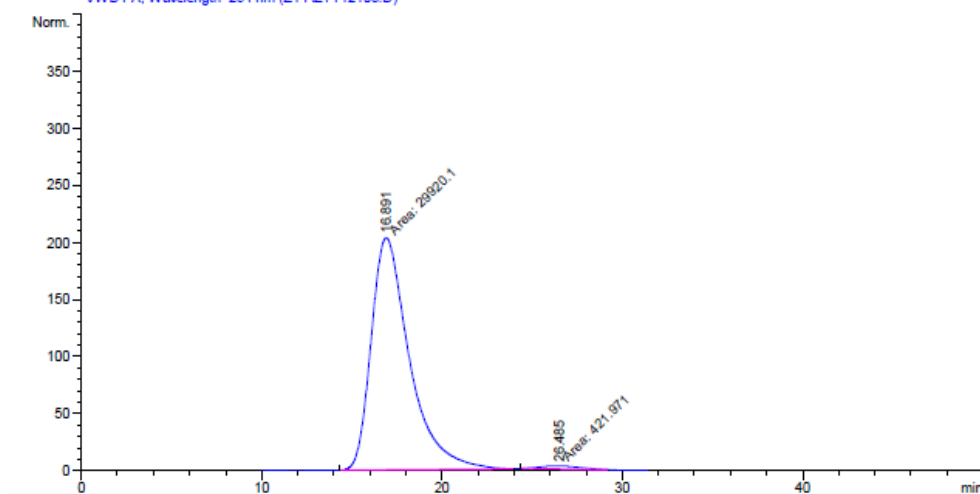

=====  
Area Percent Report  
=====

Sorted By : Signal  
Multiplier : 1.0000  
Dilution : 1.0000  
Use Multiplier & Dilution Factor with ISTDs

Signal 1: VWD1 A, Wavelength=254 nm

| Peak # | RetTime [min] | Type | Width [min] | Area mAU *s | Height [mAU] | Area %  |
|--------|---------------|------|-------------|-------------|--------------|---------|
| 1      | 16.891        | MM   | 2.4550      | 2.99201e4   | 203.12671    | 98.6093 |
| 2      | 26.485        | MM   | 2.6037      | 421.97055   | 2.70109      | 1.3907  |

**Diethyl (S,E)-3-(3-chlorophenyl)-1-((4-methoxyphenyl)amino)allylphosphonate (4c)**

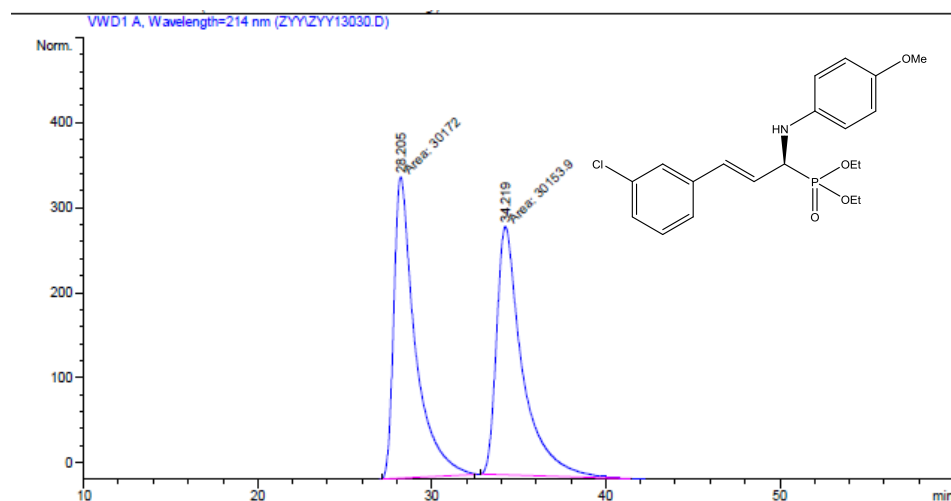

=====  
 Area Percent Report  
 =====

Sorted By : Signal  
 Multiplier : 1.0000  
 Dilution : 1.0000  
 Use Multiplier & Dilution Factor with ISTDs

Signal 1: VWD1 A, Wavelength=214 nm

| Peak # | RetTime [min] | Type | Width [min] | Area mAU *s | Height [mAU] | Area %  |
|--------|---------------|------|-------------|-------------|--------------|---------|
| 1      | 28.205        | MM   | 1.4196      | 3.01720e4   | 354.23856    | 50.0150 |
| 2      | 34.219        | MM   | 1.7210      | 3.01539e4   | 292.01779    | 49.9850 |

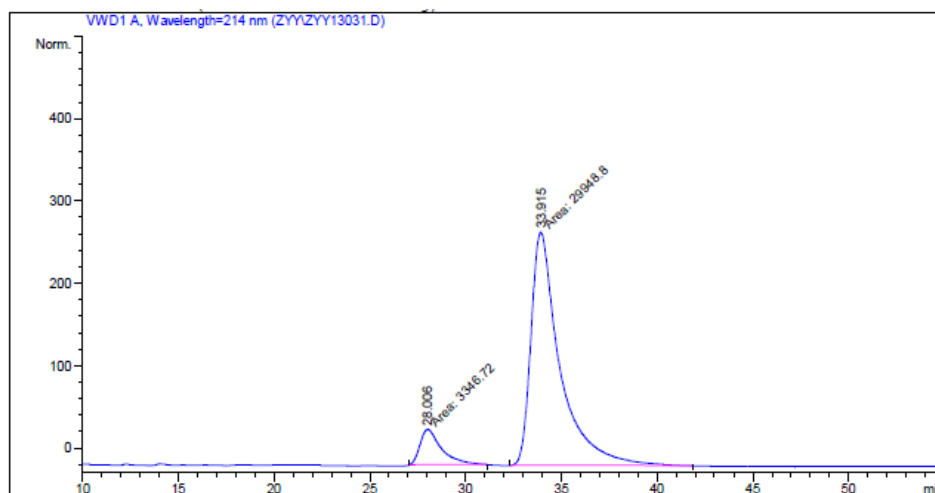

=====  
 Area Percent Report  
 =====

Sorted By : Signal  
 Multiplier : 1.0000  
 Dilution : 1.0000  
 Use Multiplier & Dilution Factor with ISTDs

Signal 1: VWD1 A, Wavelength=214 nm

| Peak # | RetTime [min] | Type | Width [min] | Area mAU *s | Height [mAU] | Area %  |
|--------|---------------|------|-------------|-------------|--------------|---------|
| 1      | 28.006        | MM   | 1.3031      | 3346.72095  | 42.80469     | 10.0516 |
| 2      | 33.915        | MM   | 1.7624      | 2.99488e4   | 283.22610    | 89.9484 |



**Diethyl (S,E)-3-(2-methoxyphenyl)-1-((4-methoxyphenyl)amino)allylphosphonate (4f)**

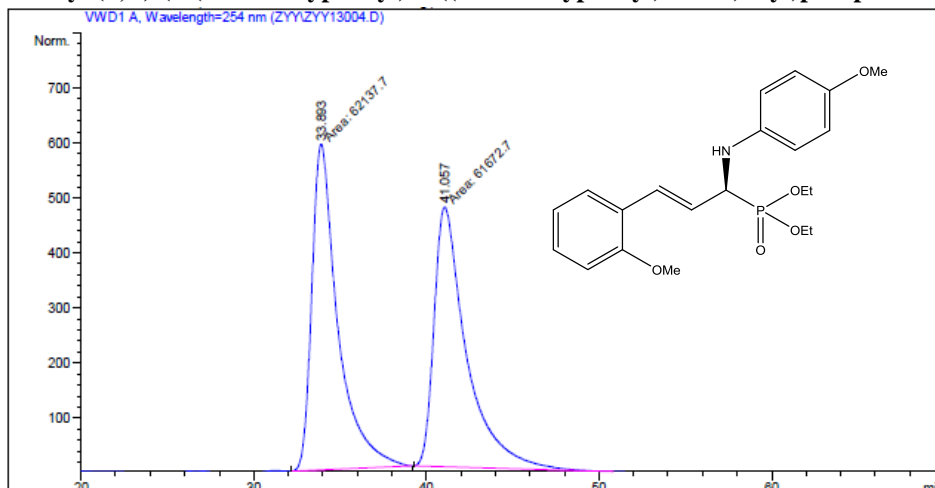

=====  
 Area Percent Report  
 =====

Sorted By : Signal  
 Multiplier : 1.0000  
 Dilution : 1.0000  
 Use Multiplier & Dilution Factor with ISTDs

Signal 1: VWD1 A, Wavelength=254 nm

| Peak # | RetTime [min] | Type | Width [min] | Area mAU  | Area %  | Height [mAU] | Area %  |
|--------|---------------|------|-------------|-----------|---------|--------------|---------|
| 1      | 33.893        | MM   | 1.7497      | 6.21377e4 | 50.1878 | 591.88098    | 50.1878 |
| 2      | 41.057        | MM   | 2.1777      | 6.16727e4 | 49.8122 | 472.00250    | 49.8122 |

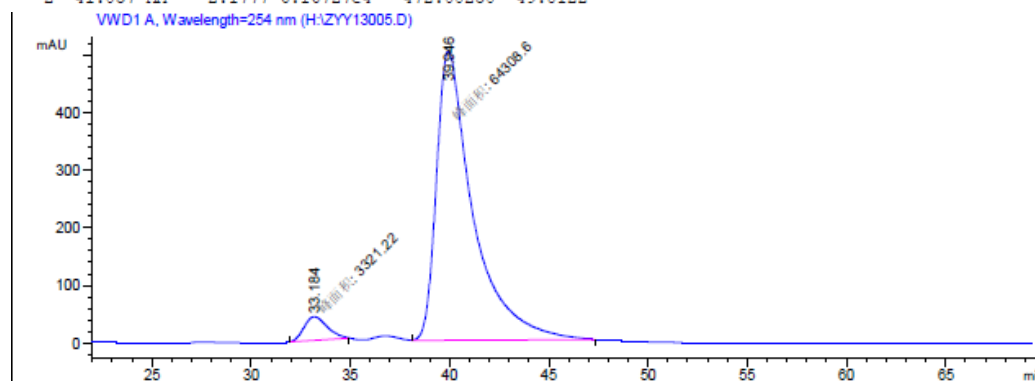

=====  
 面积百分比报告  
 =====

排序 : 信号  
 乘积因子 : 1.0000  
 稀释因子 : 1.0000  
 内标使用乘积因子和稀释因子

信号 1: VWD1 A, Wavelength=254 nm

| 峰 # | 保留时间 [min] | 类型 | 峰宽 [min] | 峰面积 mAU    | 峰面积 %   | 峰高 [mAU]  | 峰面积 %   |
|-----|------------|----|----------|------------|---------|-----------|---------|
| 1   | 33.184     | MM | 1.3418   | 3321.21973 | 4.9109  | 41.25361  | 4.9109  |
| 2   | 39.946     | MM | 2.1351   | 6.43086e4  | 95.0891 | 501.99896 | 95.0891 |

### Diethyl (S,E)-3-(4-methoxyphenyl)-1-((4-methoxyphenyl)amino)allylphosphonate (4g)

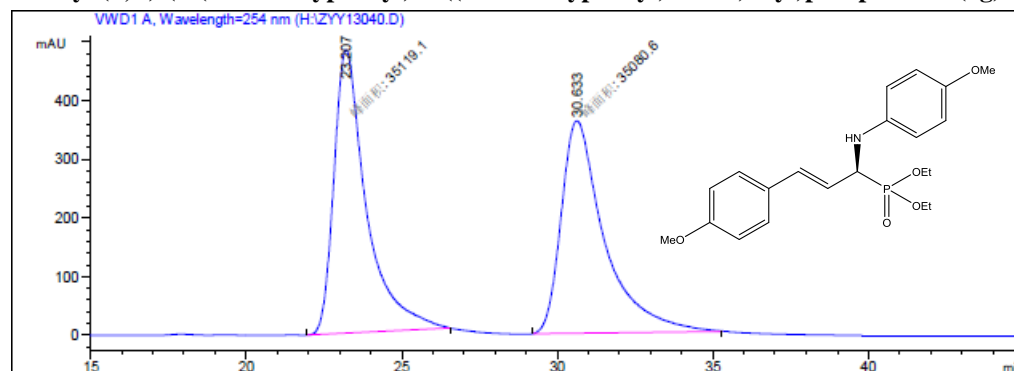

面积百分比报告

排序 : 信号  
 乘积因子 : 1.0000  
 稀释因子 : 1.0000  
 内标使用乘积因子和稀释因子

信号 1: VWD1 A, Wavelength=254 nm

| 峰 # | 保留时间 [min] | 类型 | 峰宽 [min] | 峰面积 mAU *s | 峰高 [mAU]  | 峰面积 %   |
|-----|------------|----|----------|------------|-----------|---------|
| 1   | 23.207     | MM | 1.2113   | 3.51191e4  | 483.21561 | 50.0274 |
| 2   | 30.633     | MM | 1.6127   | 3.50806e4  | 362.54532 | 49.9726 |

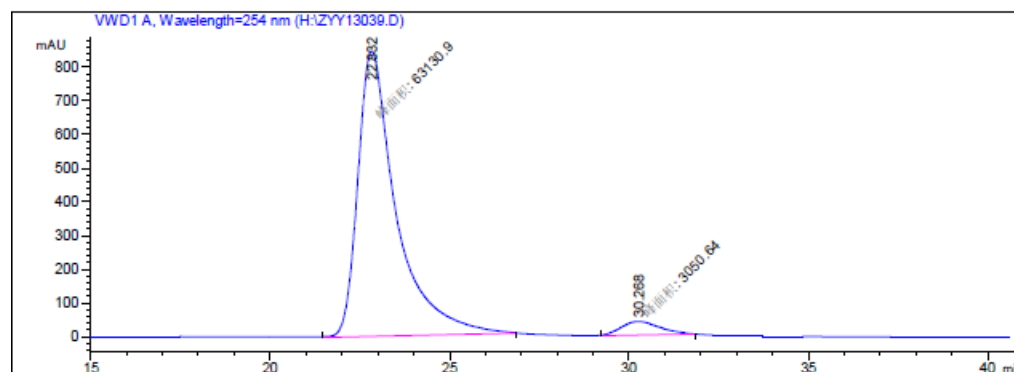

面积百分比报告

排序 : 信号  
 乘积因子 : 1.0000  
 稀释因子 : 1.0000  
 内标使用乘积因子和稀释因子

信号 1: VWD1 A, Wavelength=254 nm

| 峰 # | 保留时间 [min] | 类型 | 峰宽 [min] | 峰面积 mAU *s | 峰高 [mAU]  | 峰面积 %   |
|-----|------------|----|----------|------------|-----------|---------|
| 1   | 22.832     | MM | 1.2419   | 6.31309e4  | 847.21466 | 95.3905 |
| 2   | 30.268     | MM | 1.2563   | 3050.64233 | 40.46988  | 4.6095  |

**Diethyl (S,E)-(3-phenyl-1-(phenylamino)allyl)phosphonate (4h)**

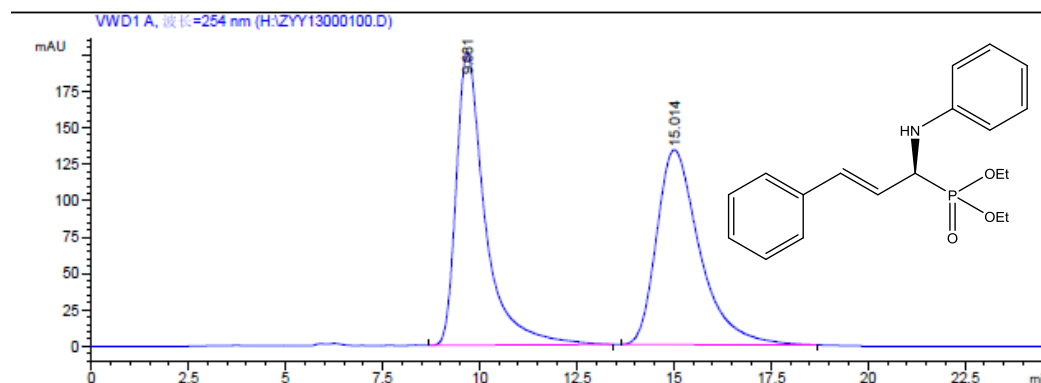

面积百分比报告

排序 : 信号  
 乘积因子 : 1.0000  
 稀释因子 : 1.0000  
 内标使用乘积因子和稀释因子

信号 1: VWD1 A, 波长=254 nm

| 峰 # | 保留时间 [min] | 类型 | 峰宽 [min] | 峰面积 mAU *s | 峰高 [mAU]  | 峰面积 %   |
|-----|------------|----|----------|------------|-----------|---------|
| 1   | 9.681      | VB | 0.7653   | 1.04034e4  | 201.06274 | 50.0821 |
| 2   | 15.014     | BB | 1.1752   | 1.03692e4  | 133.75810 | 49.9179 |

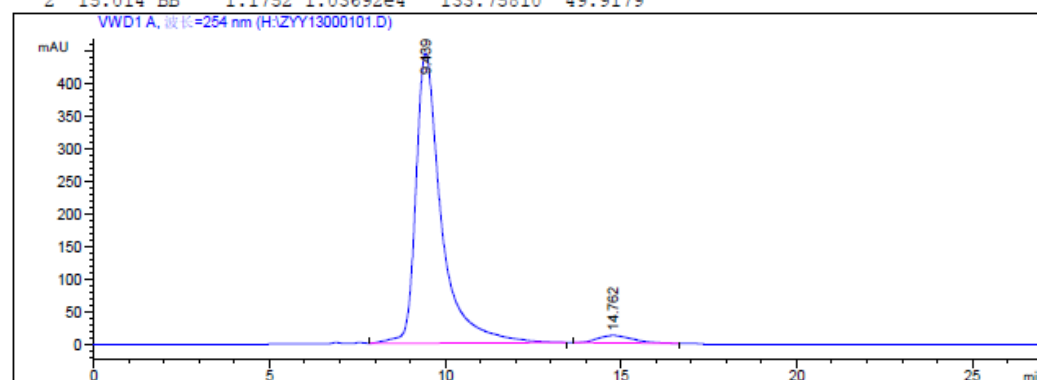

面积百分比报告

排序 : 信号  
 乘积因子 : 1.0000  
 稀释因子 : 1.0000  
 内标使用乘积因子和稀释因子

信号 1: VWD1 A, 波长=254 nm

| 峰 # | 保留时间 [min] | 类型 | 峰宽 [min] | 峰面积 mAU *s | 峰高 [mAU]  | 峰面积 %   |
|-----|------------|----|----------|------------|-----------|---------|
| 1   | 9.439      | VB | 0.7479   | 2.25537e4  | 444.37250 | 96.6251 |
| 2   | 14.762     | BB | 0.9279   | 787.74506  | 11.32580  | 3.3749  |

**Diethyl (S,E)-1-((3-chlorophenyl)amino)-3-phenylallyl)phosphonate (4i)**

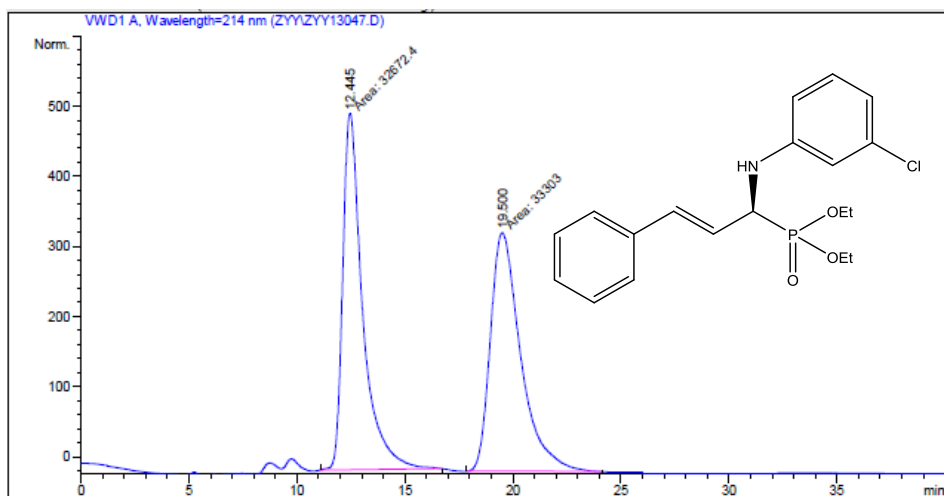

=====  
 Area Percent Report  
 =====

Sorted By : Signal  
 Multiplier : 1.0000  
 Dilution : 1.0000  
 Use Multiplier & Dilution Factor with ISTDs

Signal 1: VWD1 A, Wavelength=214 nm

| Peak # | RetTime [min] | Type | Width [min] | Area mAU *s | Height [mAU] | Area %  |
|--------|---------------|------|-------------|-------------|--------------|---------|
| 1      | 12.445        | MM   | 1.0699      | 3.26724e4   | 508.94403    | 49.5221 |
| 2      | 19.500        | MM   | 1.6295      | 3.33030e4   | 340.62820    | 50.4779 |

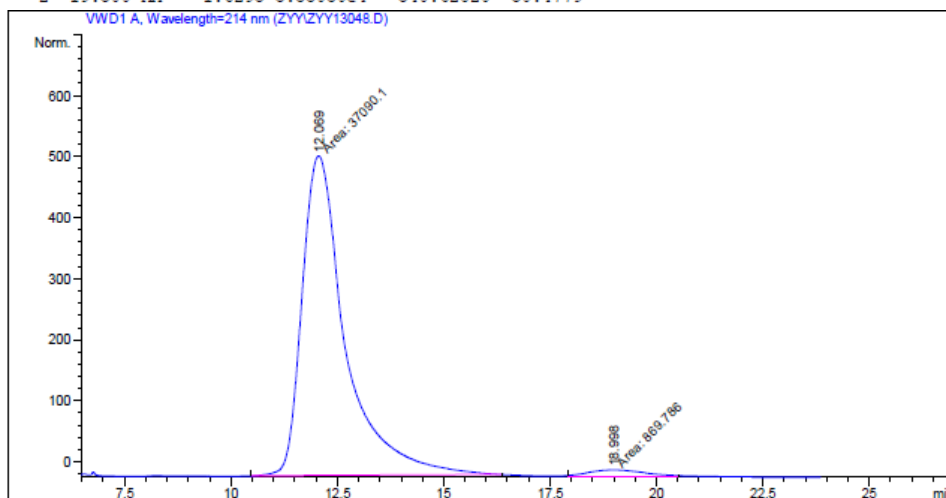

=====  
 Area Percent Report  
 =====

Sorted By : Signal  
 Multiplier : 1.0000  
 Dilution : 1.0000  
 Use Multiplier & Dilution Factor with ISTDs

Signal 1: VWD1 A, Wavelength=214 nm

| Peak # | RetTime [min] | Type | Width [min] | Area mAU *s | Height [mAU] | Area %  |
|--------|---------------|------|-------------|-------------|--------------|---------|
| 1      | 12.069        | MM   | 1.1800      | 3.70901e4   | 523.87054    | 97.7087 |
| 2      | 18.998        | MM   | 1.4303      | 869.78632   | 10.13509     | 2.2913  |

**Diethyl (R,E)-1-((4-bromophenyl)amino)-3-phenylallyl)phosphonate (4j)**

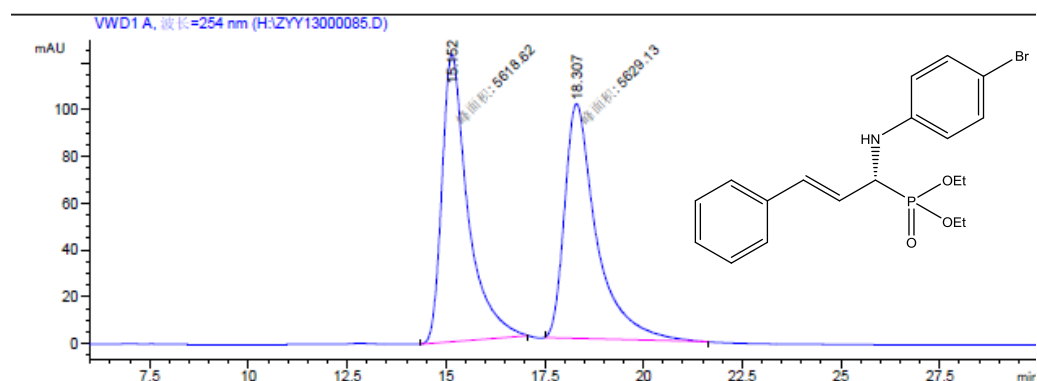

面积百分比报告

排序 : 信号  
 乘积因子 : 1.0000  
 稀释因子 : 1.0000  
 内标使用乘积因子和稀释因子

信号 1: VWD1 A, 波长=254 nm

| 峰 # | 保留时间 [min] | 类型 | 峰宽 [min] | 峰面积 mAU * s | 峰高 [mAU]  | 峰面积 %   |
|-----|------------|----|----------|-------------|-----------|---------|
| 1   | 15.152     | MM | 0.7617   | 5618.62451  | 122.93317 | 49.9533 |
| 2   | 18.307     | MM | 0.9353   | 5629.13477  | 100.31355 | 50.0467 |

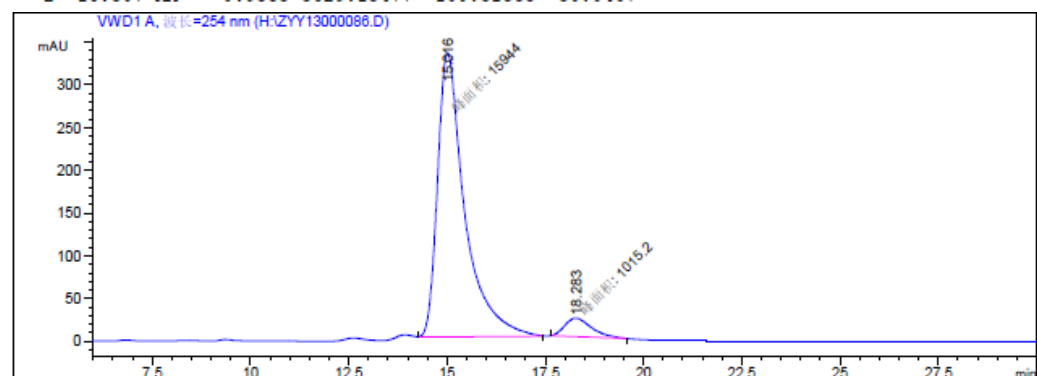

面积百分比报告

排序 : 信号  
 乘积因子 : 1.0000  
 稀释因子 : 1.0000  
 内标使用乘积因子和稀释因子

信号 1: VWD1 A, 波长=254 nm

| 峰 # | 保留时间 [min] | 类型 | 峰宽 [min] | 峰面积 mAU * s | 峰高 [mAU]  | 峰面积 %   |
|-----|------------|----|----------|-------------|-----------|---------|
| 1   | 15.016     | MM | 0.7988   | 1.59440e4   | 332.67679 | 94.0139 |
| 2   | 18.283     | MM | 0.7857   | 1015.20050  | 21.53367  | 5.9861  |

**Diethyl (S,E)-(3-(2-nitrophenyl)-1-(phenylamino)allyl)phosphonate (4k)**

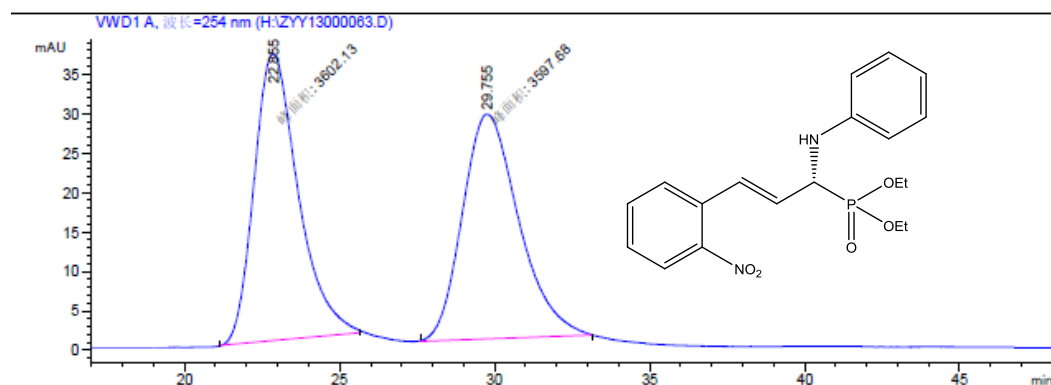

面积百分比报告

排序 : 信号  
 乘积因子 : 1.0000  
 稀释因子 : 1.0000  
 内标使用乘积因子和稀释因子

信号 1: VWD1 A, 波长=254 nm

| 峰 # | 保留时间 [min] | 类型 | 峰宽 [min] | 峰面积 mAU *s | 峰高 [mAU] | 峰面积 %   |
|-----|------------|----|----------|------------|----------|---------|
| 1   | 22.855     | MM | 1.6485   | 3602.13232 | 36.41857 | 50.0309 |
| 2   | 29.755     | MM | 2.1041   | 3597.68213 | 28.49687 | 49.9691 |

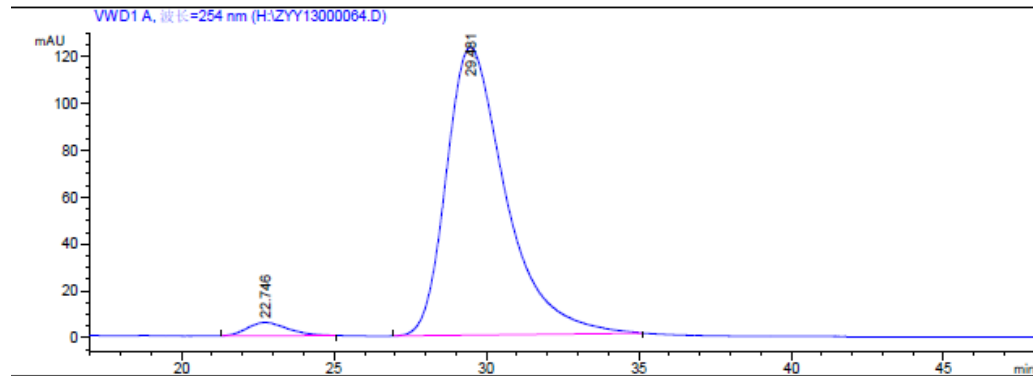

面积百分比报告

排序 : 信号  
 乘积因子 : 1.0000  
 稀释因子 : 1.0000  
 内标使用乘积因子和稀释因子

信号 1: VWD1 A, 波长=254 nm

| 峰 # | 保留时间 [min] | 类型 | 峰宽 [min] | 峰面积 mAU *s | 峰高 [mAU]  | 峰面积 %   |
|-----|------------|----|----------|------------|-----------|---------|
| 1   | 22.746     | BB | 1.1701   | 527.80609  | 5.63404   | 3.0716  |
| 2   | 29.481     | BB | 1.9851   | 1.66555e4  | 122.84379 | 96.9284 |

**Diethyl (S,E)-(1-((3-chlorophenyl)amino)-3-(2-nitrophenyl)allyl)phosphonate (4I)**

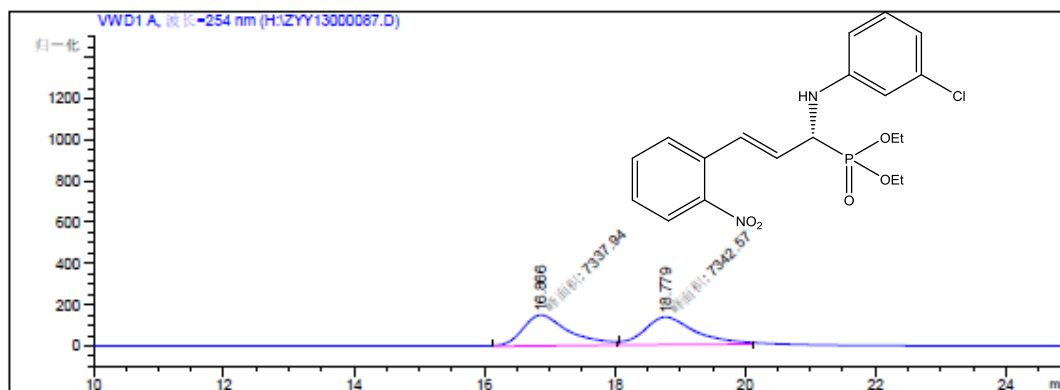

=====  
 面积百分比报告  
 =====

排序 : 信号  
 乘积因子 : 1.0000  
 稀释因子 : 1.0000  
 内标使用乘积因子和稀释因子

信号 1: VWD1 A, 波长=254 nm

| 峰 # | 保留时间 [min] | 类型 | 峰宽 [min] | 峰面积 mAU *s | 峰高 [mAU]  | 峰面积 %   |
|-----|------------|----|----------|------------|-----------|---------|
| 1   | 16.866     | MF | 0.8198   | 7337.93750 | 149.18555 | 49.9842 |
| 2   | 18.779     | MM | 0.9115   | 7342.56738 | 134.26286 | 50.0158 |

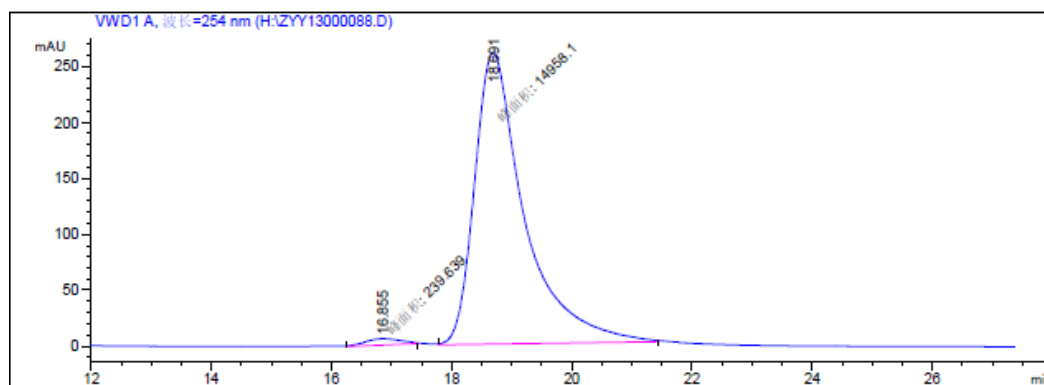

=====  
 面积百分比报告  
 =====

排序 : 信号  
 乘积因子 : 1.0000  
 稀释因子 : 1.0000  
 内标使用乘积因子和稀释因子

信号 1: VWD1 A, 波长=254 nm

| 峰 # | 保留时间 [min] | 类型 | 峰宽 [min] | 峰面积 mAU *s | 峰高 [mAU]  | 峰面积 %   |
|-----|------------|----|----------|------------|-----------|---------|
| 1   | 16.855     | MM | 0.6900   | 239.63919  | 5.78853   | 1.5768  |
| 2   | 18.691     | MM | 0.9588   | 1.49581e4  | 260.02487 | 98.4232 |

Diethyl (R)-(((4-methoxyphenyl)amino)(2-nitrophenyl)methyl)phosphonate (4m)

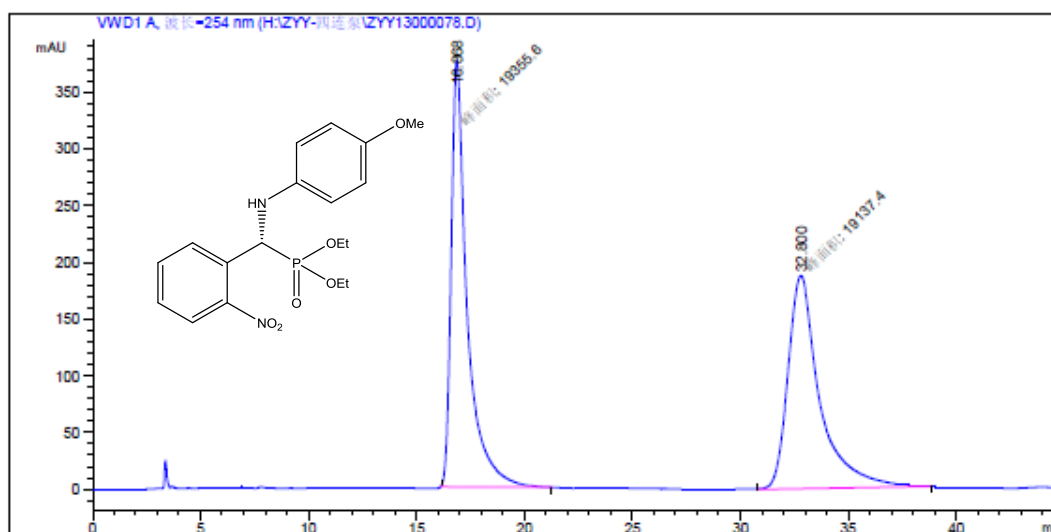

| 峰 # | 保留时间 [min] | 类型 | 峰宽 [min] | 峰面积 mAU *s | 峰高 [mAU]  | 峰面积 *   |
|-----|------------|----|----------|------------|-----------|---------|
| 1   | 16.868     | MM | 0.8593   | 1.93556e4  | 375.40598 | 50.2824 |
| 2   | 32.800     | MM | 1.6989   | 1.91374e4  | 187.74457 | 49.7166 |

总量 : 3.84930e4 563.15054

\*\*\* 报告结束 \*\*\*

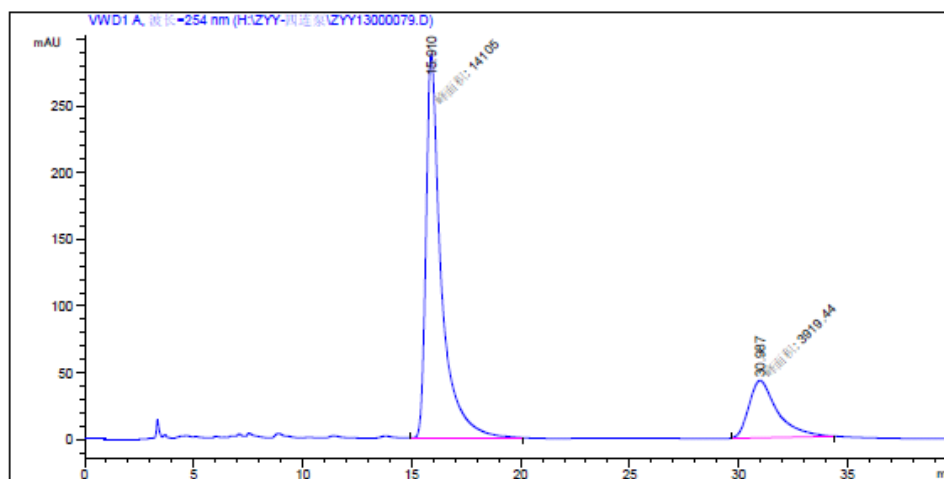

| 峰 # | 保留时间 [min] | 类型 | 峰宽 [min] | 峰面积 mAU *s | 峰高 [mAU]  | 峰面积 *   |
|-----|------------|----|----------|------------|-----------|---------|
| 1   | 15.910     | MM | 0.8181   | 1.41050e4  | 287.34915 | 78.2548 |
| 2   | 30.987     | MM | 1.5280   | 3919.44360 | 42.75269  | 21.7452 |

总量 : 1.80244e4 330.10184

\*\*\* 报告结束 \*\*\*



**Diethyl (S,E)-(1-amino-3-(2-chlorophenyl)allyl)phosphonate (5)**

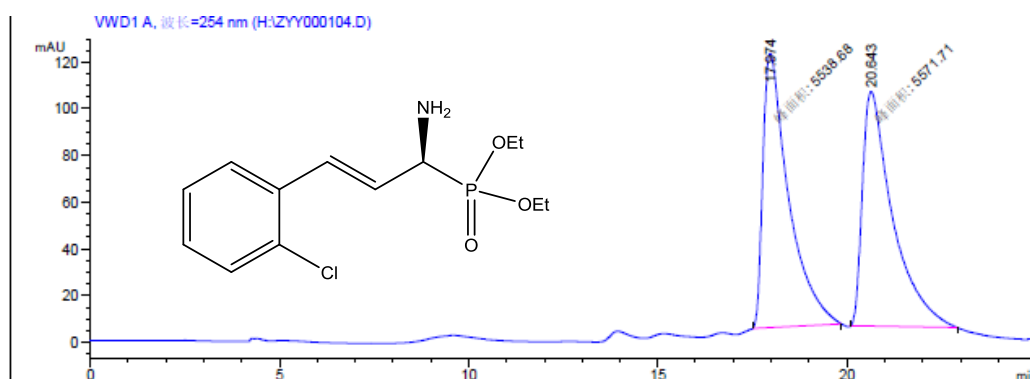

面积百分比报告

排序 : 信号  
 乘积因子 : 1.0000  
 稀释因子 : 1.0000  
 内标使用乘积因子和稀释因子

信号 1: VWD1 A, 波长=254 nm

| 峰 # | 保留时间 [min] | 类型 | 峰宽 [min] | 峰面积 mAU *s | 峰高 [mAU]  | 峰面积 %   |
|-----|------------|----|----------|------------|-----------|---------|
| 1   | 17.974     | MM | 0.7866   | 5538.67529 | 117.35621 | 49.8513 |
| 2   | 20.643     | MM | 0.9251   | 5571.71484 | 100.37855 | 50.1487 |

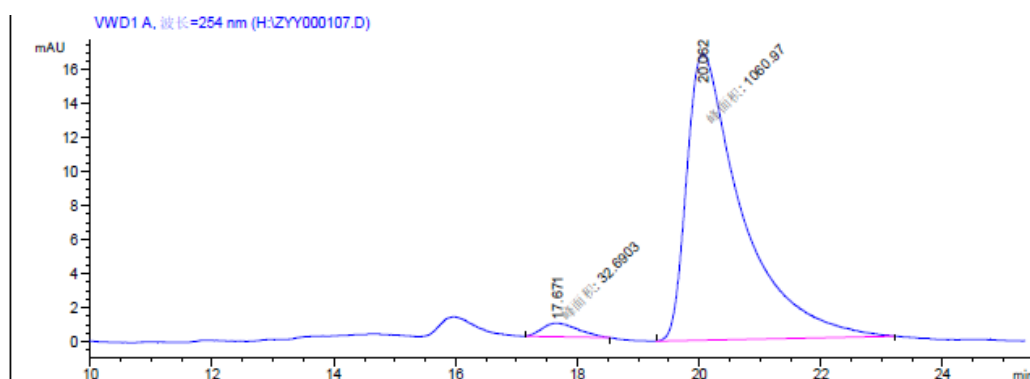

面积百分比报告

排序 : 信号  
 乘积因子 : 1.0000  
 稀释因子 : 1.0000  
 内标使用乘积因子和稀释因子

信号 1: VWD1 A, 波长=254 nm

| 峰 # | 保留时间 [min] | 类型 | 峰宽 [min] | 峰面积 mAU *s | 峰高 [mAU]   | 峰面积 %   |
|-----|------------|----|----------|------------|------------|---------|
| 1   | 17.671     | MM | 0.6857   | 32.69025   | 7.94548e-1 | 2.9891  |
| 2   | 20.062     | MM | 1.0485   | 1060.96594 | 16.86471   | 97.0109 |
